# Supplementary material for: A Molecular Host Response Assay to Discriminate Between Sepsis and Infection-Negative Systemic Inflammation in Critically Ill Patients: Discovery and Validation in Independent Cohorts
Source: PLoS Med. 2015 Dec 8;12(12):e1001916. doi: 10.1371/journal.pmed.1001916 (PMC4672921; doi:10.1371/journal.pmed.1001916)
Supplement: S2 Data — (XLSX) [file pmed.1001916.s002.xlsx]

## Sheet: line data - Discovery Cohort
Clin Trial	hospital	patient #	unique patient ID	CEL file	Diagnostic_Group	ethnicity	age	sex	PCT (ng/mL)	comment (PCT)	blood culture pos(1), neg(0)	other culture pos(1), neg(0)	Gram +	Gram -	Fungus	mixed	ANY INFECTION	QA check	comments-1	infection sites	comments-2	REF-1	REF-2
RTT	A	2	RTT_A_2	A0056497.CEL	Septic_Shock	C	68	F	1.93		0	1	1	1	0	1	1	ok	Gram +ve (SA) and Gram -ve . Samples collected pre/Day 1			RTT trial clinical notes_29 Feb 2012 Allison_S
RTT	A	3	RTT_A_3	A0057637.CEL	Septic_Shock	C	73	M	200	greater than	0	suspected	0	0	0	0	0	ok	suspected only			RTT trial clinical notes_29 Feb 2012 Allison_S
RTT	A	4	RTT_A_4	A0057638.CEL	Septic_Shock	C	62	F	21.24		1	1	0	1	1	1	1	ok	Urosepsis. candida glabrata and Gram -ve (E coli)	UTI		RTT trial clinical notes_29 Feb 2012 Allison_S
RTT	A	5	RTT_A_5	A0057636.CEL	Septic_Shock	C	78	F	20.21		1	1	1	0	1	1	1	ok	lung (yeast Candida albicans); urine, blood (strep pneumoniae). Also Aspergillus fumigatis	BLOOD, LUNG, UTI		RTT trial clinical notes_29 Feb 2012 Allison_S
RTT	A	6	RTT_A_6	A0056437.CEL	Septic_Shock	C	66	F	0.49		1	1	1	1	1	1	1	ok	severe sepsis resulting from VAP - lung (klebsiella pneumonia), blood, bowel (yeast: candida albicans and aspergillus fumigatus). Also Staph aureus; Staph epidermis.	BLOOD, BOWEL, LUNG		RTT trial clinical notes_29 Feb 2012 Allison_S
RTT	A	7	RTT_A_7	A0056289.CEL	Septic_Shock	C	84	M	12.5		0	suspected	0	0	0	0	0	ok	infection suspected, not proven. intraabdominal wounds (perforated heaptic flexure bowel)			RTT trial clinical notes_29 Feb 2012 Allison_S
RTT	A	8	RTT_A_8	A0056391.CEL	Septic_Shock	C	68	M	0.05	less than	0	1	1	1	0	1	1	ok	tracheostomy site: Staph aureus (Gram-pos). Lung: Pseudomonas (Gram-neg)	TRACHEOSTOMY SITE		RTT trial clinical notes_29 Feb 2012 Allison_S
RTT	A	9	RTT_A_9	A0056275.CEL	Severe_Sepsis	C	62	M	1.88		1	0	1	0	0	0	1	ok	Gram +ve (Strep dysgalactiae)			RTT trial clinical notes_29 Feb 2012 Allison_S
RTT	A	10	RTT_A_10	A0057640.CEL	Septic_Shock	ATSI	33	F	42.57		1	0	0	1	0	0	1	ok	Gram -ve (Enterobacter cloacae)			RTT trial clinical notes_29 Feb 2012 Allison_S
RTT	A	11	RTT_A_11	A0062011.CEL	Septic_Shock	C	60	F	8.32		0	1	1	0	0	0	1	ok	Intra-abdominal abscess: Gram +ve (streptococcus Group G)	ABDOMEN		RTT trial clinical notes_29 Feb 2012 Allison_S
RTT	A	12	RTT_A_12	A0056298.CEL	Septic_Shock	C	38	F	40.53		1	1	0	1	0	0	1	ok	Blood & UTI: E. coli (Gram-negative)	BLOOD, UTI		RTT trial clinical notes_29 Feb 2012 Allison_S
RTT	A	13	RTT_A_13	A0056371.CEL	Septic_Shock	ATSI	28	F	34.09		1	1	1	1	0	1	1	ok	Blood & wound: Gram +ve (strep anginosus) and Gram -ve (fusobacterium necrophorum)	BLOOD, WOUND		RTT trial clinical notes_29 Feb 2012 Allison_S
RTT	A	14	RTT_A_14	A0056303.CEL	Septic_Shock	C	85	M	200	greater than	1	1	0	1	0	0	1	ok	blood & UTI: Proteus mirabilis (Gram -ve only)	BLOOD, UTI		RTT trial clinical notes_29 Feb 2012 Allison_S
RTT	A	15	RTT_A_15	A0056285.CEL	Septic_Shock	ASIAN	60	F	2.83		0	1	0	0	1	0	1	ok	lung infection due to candida albicans	LUNG		RTT trial clinical notes_29 Feb 2012 Allison_S
RTT	A	16	RTT_A_16	A0056244.CEL	Septic_Shock	C	32	F	0.1		0	1	1	0	1	1	1	ok	Vaginal infection: Gram +ve (Staph aureus and strep agalactiae) and candida albicans	VAGINA		RTT trial clinical notes_29 Feb 2012 Allison_S
RTT	A	17	RTT_A_17	A0057641.CEL	Septic_Shock	C	60	M	0.27		1	1	1	0	0	0	1	ok	Gram +ve (staph epidermis)			RTT trial clinical notes_29 Feb 2012 Allison_S
RTT	A	18	RTT_A_18	A0057643.CEL	Severe_Sepsis	C	46	M	6.19		0	1	0	1	0	0	1	ok	lung & abdominal: Pseudomonas aeroginosa (Gram-negative)	LUNG, ABDOMEN		RTT trial clinical notes_29 Feb 2012 Allison_S
RTT	A	19	RTT_A_19	A0056427.CEL	Septic_Shock	C	72	M	2.97		0	suspected	0	0	0	0	0	ok	suspected only			RTT trial clinical notes_29 Feb 2012 Allison_S
RTT	A	20	RTT_A_20	A0056337.CEL	Septic_Shock	C	88	M	40.06		0	1	1	1	1	1	1	ok	Intra-abdominal: Gram +e (enterococcus faecalis) and Gram -ve and candida albicans	ABDOMEN		RTT trial clinical notes_29 Feb 2012 Allison_S
RTT	A	21	RTT_A_21	A0056396.CEL	Septic_Shock	C	71	F	200	greater than	0	1	1	0	0	0	1	ok	Inra-abdominal: Gram +ve (enterococcus facecalis, strepococcus sp., clostridium perfringen and sordelli	ABDOMEN		RTT trial clinical notes_29 Feb 2012 Allison_S
RTT	A	22	RTT_A_22	A0062054.CEL	Septic_Shock	C	83	M	2.53		1	1	1	0	1	1	1	ok	blood + synovial fluid = staph aureus (Gram-pos); lung + urine = candida albicans	BLOOD, SYNOVIAL FLUID		RTT trial clinical notes_29 Feb 2012 Allison_S
RTT	A	23	RTT_A_23	A0056376.CEL	Septic_Shock	C	86	F	8.05		0	1	1	1	0	1	1	ok	Bile fluid: Gram +ve (Enteroccocus faecalis) and Gram -ve (E. coli, Klebsiella pneumoniae)	BILE FLUID		RTT trial clinical notes_29 Feb 2012 Allison_S
RTT	A	24	RTT_A_24	A0056234.CEL	Septic_Shock	C	72	F	0.05	less than	0	1	0	0	1	0	1	ok	Lung: aspergillus and para influenza 3 (RNA virus)	LUNG		RTT trial clinical notes_29 Feb 2012 Allison_S
RTT	A	26	RTT_A_26	A0056250.CEL	Septic_Shock	C	76	F	0.06		0	suspected	0	0	0	0	0	ok	infection suspected, not proven			RTT trial clinical notes_29 Feb 2012 Allison_S
RTT	A	27	RTT_A_27	A0056365.CEL	Severe_Sepsis	C	52	F	0.38		0	suspected	0	0	0	0	0	ok	infection suspected, not proven			RTT trial clinical notes_29 Feb 2012 Allison_S
RTT	A	28	RTT_A_28	A0056315.CEL	Septic_Shock	C	65	F	15.85		1	1	0	1	0	0	1	ok	Gram -ve only. UTI: E. coli	UTI		RTT trial clinical notes_29 Feb 2012 Allison_S
RTT	A	29	RTT_A_29	A0056347.CEL	Septic_Shock	C	79	F	20.18		0	1	0	1	0	0	1	ok	Gram -ve only. Lung: haemophilis influenzae	LUNG		RTT trial clinical notes_29 Feb 2012 Allison_S
RTT	B	1	RTT_B_1	A0056341.CEL	Severe_Sepsis	C	52	M	1.64		0	1	1	1	0	1	1	ok	abdominal sepsis: candida albicans and Gram -ve (stenotrophomaonas maltophilia)	ABDOMEN		RTT trial clinical notes_29 Feb 2012 Allison_S
RTT	B	2	RTT_B_2	A0062096.CEL	Septic_Shock	C	89	M	4.2		0	suspected	0	0	0	0	0	ok	infection suspected, not proven			RTT trial clinical notes_29 Feb 2012 Allison_S
RTT	B	3	RTT_B_3	A0062102.CEL	Septic_Shock	C	67	M	6.02		0	1	1	1	0	1	1	ok	Gram+ve and Gram -ve			RTT trial clinical notes_29 Feb 2012 Allison_S
RTT	B	5	RTT_B_5	A0057647.CEL	Septic_Shock	C	71	F	0.11		0	1	1	1	0	1	1	ok	Gram +ve (staphylococcus) and Gram -ve (E.coli and klebsiella pneumonia)			RTT trial clinical notes_29 Feb 2012 Allison_S
RTT	B	6	RTT_B_6	A0056249.CEL	Severe_Sepsis	C	29	F	13.07		0	1	0	1	0	0	1	ok	endotrachael infection: Gram -ve only (enterobacter; pseudomonas fluorescens)	TRACHEA		RTT trial clinical notes_29 Feb 2012 Allison_S
RTT	B	7	RTT_B_7	A0057650.CEL	Severe_Sepsis	C	34	M	1.24		0	1	1	1	0	1	1	ok	Gram +ve (enterococcus faecalis) and Gram -ve (serratia marcescens)			RTT trial clinical notes_29 Feb 2012 Allison_S
RTT	B	10	RTT_B_10	A0057648.CEL	Severe_Sepsis	C	74	M	3.38		1	1	1	1	1	1	1	ok	Blood, urine, throat. Gram +ve (staph hominis) and Gram -ve and candida albicans	BLOOD, THROAT, UTI		RTT trial clinical notes_29 Feb 2012 Allison_S
RTT	B	12	RTT_B_12	A0057656.CEL	Septic_Shock	C	71	M	0.17		1	1	1	0	0	0	1	ok	blood, CNS. Gram +ve (staph)	BLOOD, CNS		RTT trial clinical notes_29 Feb 2012 Allison_S
RTT	B	13	RTT_B_13	A0057657.CEL	Severe_Sepsis	C	43	M	0.05	less than	0	1	1	0	1	1	1	ok	Lung, rectal infections: Gram +ve (mixed streptococci) and candida	LUNG, RECTUM		RTT trial clinical notes_29 Feb 2012 Allison_S
RTT	B	14	RTT_B_14	A0056326.CEL	Septic_Shock	C	41	M	0.06		0	1	0	1	0	0	1	ok	Lung. ET aspirate: Gram -ve only (Elizabethkingia meningoseptica, E coli, haemophilius)	LUNG		RTT trial clinical notes_29 Feb 2012 Allison_S
RTT	B	16	RTT_B_16	A0057655.CEL	Severe_Sepsis	C	28	F	26.16		0	1	1	0	1	1	1	ok	lung, UTI. staph aureus; staph pyogenes (lung) and candida albicans (urinary). [Strep also listed]	LUNG, UTI		RTT trial clinical notes_29 Feb 2012 Allison_S
RTT	B	17	RTT_B_17	A0057658.CEL	Severe_Sepsis	C	24	M	3.25		0	1	1	1	0	1	1	ok	Lung. Gram-pos: streptoccus pneumoniae. Gram-neg: E. coli. Influenza also noted	LUNG		RTT trial clinical notes_29 Feb 2012 Allison_S
RTT	B	18	RTT_B_18	A0057654.CEL	Septic_Shock	ATSI	40	F	0.11		1	1	1	1	0	1	1	ok	Blood, lung, UTI. Gram +ve (Staph but coag neg; streptococcus; enterococcus) plus Gram -ve (Proteus mirabilis, citrobacter koseri; haemophilus)	BLOOD, LUNG, UTI		RTT trial clinical notes_29 Feb 2012 Allison_S
RTT	B	19	RTT_B_19	A0056386.CEL	Severe_Sepsis	C	59	M	0.07		0	1	1	0	0	0	1	ok	CNS. Gram +ve (strep milleri)	CNS		RTT trial clinical notes_29 Feb 2012 Allison_S
RTT	B	20	RTT_B_20	A0056277.CEL	Septic_Shock	C	24	M	32.71		0	1	1	0	0	0	1	ok	Lung, UTI. Urine and BAL: streptococcus pneumonia (Gram +ve)	LUNG, UTI		RTT trial clinical notes_29 Feb 2012 Allison_S
RTT	B	21	RTT_B_21	A0056349.CEL	Severe_Sepsis	ATSI	63	M	0.13		0	1	1	1	1	1	1	ok	LUNG, RECTUM. Gram-pos (rectal swab: VRE - vancomycin resistant enterococci). BAL demonstrates gram-neg (E. coli, klebsiella pneumonia). Candida noted also.	LUNG, RECTUM		RTT trial clinical notes_29 Feb 2012 Allison_S
RTT	B	22	RTT_B_22	A0056409.CEL	Severe_Sepsis	C	46	M	99.39		0	1	1	1	1	1	1	ok	gram-pos (lung = staphlococcus and candida; sigmoid colon = staphloccus; nasal swab = MRSA). Gram-neg (sigmoid colon = E coli; lung = enterobacter cloacae and klebsiella pneumonia). Fungus (sigmoid colon: candida)	LUNG, SIGMOID COLON		RTT trial clinical notes_29 Feb 2012 Allison_S
RTT	B	23	RTT_B_23	A0056373.CEL	Septic_Shock	C	51	M	10.53		0	1	0	0	1	0	1	ok	Lung: candida albicans	LUNG		RTT trial clinical notes_29 Feb 2012 Allison_S
RTT	B	24	RTT_B_24	A0057659.CEL	Severe_Sepsis	C	51	M	0.18		1	1	1	0	1	1	1	ok	blood = staph epidermidis (GRAM-POS). rectal = clostridium difficile A&B (gram-pos). Lung: Candida	BLOOD, LUNG, RECTUM		RTT trial clinical notes_29 Feb 2012 Allison_S
RTT	B	25	RTT_B_25	A0056306.CEL	Severe_Sepsis	C	69	M	1.29		0	suspected	0	0	0	0	0	ok	infection suspected, not proven			RTT trial clinical notes_29 Feb 2012 Allison_S
RTT	B	26	RTT_B_26	A0056465.CEL	Septic_Shock	C	64	M	19.98		0	1	1	0	0	0	1	ok	Lung: Gram +ve (streptococcus pneumonia)	LUNG		RTT trial clinical notes_29 Feb 2012 Allison_S
RTT	B	27	RTT_B_27	A0056477.CEL	Severe_Sepsis	C	48	F	0.08		1	1	1	1	1	1	1	ok	central venous line tip positive for Pseudomonas Aeruginosa (GRAM-NEG). lung = staph aureus (GRAM-POS), pseudomonas aeruginosa (GRAM-NEG); cerebospinal fluid = P.aeurginosa (GRAM-NEG). Skin = Candida	CENTRAL VENOUS LINE, CNS, LUNG, SKIN		RTT trial clinical notes_29 Feb 2012 Allison_S
RTT	B	28	RTT_B_28	A0056487.CEL	Severe_Sepsis	C	56	M	0.67		0	1	0	1	0	0	1	ok	Lung: proteus bacterium (enterobacteriaceae) (gram-neg)	LUNG		RTT trial clinical notes_29 Feb 2012 Allison_S
RTT	B	29	RTT_B_29	A0061933.CEL	Severe_Sepsis	C	62	M	1.36		1	1	1	1	0	1	1	ok	Gram +ve (staph epi) and Gram -ve (Pseudomonas aeruginosa)	BLOOD (CENTRAL LINE), CHEST (INTERCOSTAL CATHETER), LUNG, UTI		RTT trial clinical notes_29 Feb 2012 Allison_S
RTT	B	30	RTT_B_30	A0061943.CEL	Severe_Sepsis	C	20	M	0.46		0	1	1	1	0	1	1	ok	Gram +ve (staph) and Gram -ve (Enterobacter cloacae)	LUNG		RTT trial clinical notes_29 Feb 2012 Allison_S
RTT	C	1	RTT_C_1	A0056241.CEL	Severe_Sepsis	C	70	F	50.68		0	1	0	1	0	0	1	ok	Gram -ve only (E coli)	UTI		RTT trial clinical notes_29 Feb 2012 Allison_S
RTT	C	2	RTT_C_2	A0056430.CEL	Septic_Shock	C	79	M	31.97		0	1	0	1	0	0	1	ok	Gram -ve only (E coli)	ABDOMEN, UTI		RTT trial clinical notes_29 Feb 2012 Allison_S
RTT	C	3	RTT_C_3	A0062551.CEL	Septic_Shock	ASIAN	74	M	44.62		0	1	1	0	0	0	1	ok	Gram +ve (enteroccocus faecalis)	ABDOMEN		RTT trial clinical notes_29 Feb 2012 Allison_S
RTT	C	5	RTT_C_5	A0061927.CEL	Septic_Shock	C	57	M	11.85		1	0	1	0	0	0	1	ok	Gram +ve (resmbled stapholocccus)	BLOOD (CARDIAC VALVE PROSTHESIS)		RTT trial clinical notes_29 Feb 2012 Allison_S
GCP_PHASE1	D	8	GCP1_D_8	A0056190.CEL	Mild_Sepsis	C	70	M	0.08		0	1	1	0	0	0	1	ok	blood: NO GROWTH AFTER 5 DAYS INTUBATION [sic]. URINE MICROSCOPY 10/06/2008 AT 00:00. RESULT: ENTEROCOCCUS FAECALIS	UTI	Gram Positive [day 2]	Phase1GCP_Appx_2009_10_12, p152, 156	SampleDatabaseAsuragen_Sept2012
GCP_PHASE1	D	41	GCP1_D_41	A0056082.CEL	Mild_Sepsis	C	77	F	1.63		not checked	1	0	1	0	0	1	ok	pleural fluid positive: ESCHERICHIA COLI +	PLEURUM	Gram Negative [days 2,3,4]	Phase1GCP_Appx_2009_10_12, p153/212	SampleDatabaseAsuragen_Sept2012
GCP_PHASE1	D	43	GCP1_D_43	A0056051.CEL	Mild_Sepsis	C	54	F	3.55		0	1	1	1	1	1	1	ok	blood: NO GROWTH AFTER 5 DAYS INCUBATION. PERITONEAL SWAB CULTURE (+ for Candida albicans, gram-positive cocci & bacilli, gram-negative bacilli, Enterobacter cloaecae, Enterococcus faecium), SPUTUM CULTURE (+ for gram-negative bacilli, Enterobacter cloaecae), ABDOMEN DRAIN FLUID CULTURE (+ for gram-negative bacilli, gram-positive bacilli, Candida albicans, Enterobacter cloaecae).DAYS INCUBATION	PERITONEUM, LUNG, ABDOMEN	Gram Negative [day 1]	Phase1GCP_Appx_2009_10_12, p153, 160, 161, 162	SampleDatabaseAsuragen_Sept2012
GCP_PHASE1	D	46	GCP1_D_46	A0056046.CEL	Mild_Sepsis	C	54	M	62.2		1	not checked	1	0	0	0	1	ok	ORGANISM 1: STAPHYLCOCCUS SPECIES (COAG NEG). Note: "This isolate is of dubious significance and should be considered in relation to the patient's clinical condition"		Blood Culture Positive [day 1]	Phase1GCP_Appx_2009_10_12, p153, 163	SampleDatabaseAsuragen_Sept2012
GCP_PHASE1	D	50	GCP1_D_50	A0056056.CEL	Mild_Sepsis	C	61	F	2.11		0	not checked	0	0	0	0	0	ok	NO GROWTH AFTER 5 DAYS INCUBATION		Gram Positive [day 1]	Phase1GCP_Appx_2009_10_12, p153/212	SampleDatabaseAsuragen_Sept2012
GCP_PHASE1	D	51	GCP1_D_51	A0056045.CEL	Mild_Sepsis	C	68	M	0.36		0	1	0	1	0	0	1	ok	BLOOD CULTURE: negative, LIVER ABSCESS FLUID, LEFT MESENTERIC DRAIN CULTURE: Streptococcus milleri group	LIVER ABSCESS, MESENTERIC DRAIN	Gram Positive [day 1]	Phase1GCP_Appx_2009_10_12, p153/212	SampleDatabaseAsuragen_Sept2012
GCP_PHASE1	D	52	GCP1_D_52	A0056105.CEL	Mild_Sepsis	C	37	F	8.9		0	1	1	1	0	1	1	ok	BLOOD CULTURE: STERILE AFTER 5 DAYS INCUBATION. SPUTUM: a few gram-pos cocci. DRAIN FLUID, LEFT MESENTERIC: gram-neg bacilli, Klebsiella pneumoniae. GASTROSOMY FLUID DRAIN CULTURE: gram-pos cocci, gram-neg bacilli, Bacteroides GP (Fragilis), coag-neg Staphylococcus, Klebsiella pneumoniae.	GASTROSOMY DRAIN, MESENTERIC DRAIN	Gram Negative [day 2,3]	Phase1GCP_Appx_2009_10_12, p153, 164, 165, 166, 167.	SampleDatabaseAsuragen_Sept2012
GCP_PHASE1	D	55	GCP1_D_55	A0056035.CEL	Mild_Sepsis	C	78	M	0.69		1	1	1	0	0	1	1	ok	BLOOD: gram-pos cocci, Streptococcus milleri group. SYNOVIAL FLUID, RIGHT SHOULDER (+ Streptococcus milleri group), BLOOD CULTURE (+), PSOAS ABSCESS TISSUE CULTURE (+ Streptococcus milleri group), LEFT KNEE WOUND TISSUE CULTURE (+ Streptococcus anginosus)	BLOOD, SYNOVIAL FLUID, PSOAS ABSCESS, KNEE WOUND	Blood Culture Positive [day 1]	Phase1GCP_Appx_2009_10_12, p153, 168, 169, 170	SampleDatabaseAsuragen_Sept2012
GCP_PHASE1	D	57	GCP1_D_57	A0056076.CEL	Mild_Sepsis	C	50	F	0.32		1	1	1	1	0	1	1	ok	Blood: gram-pos cocci, Streptococcus dysgalactiae. Urine: Eschericia coli, Klebsiella pneumoniae.	BLOOD	Blood Culture Positive [day 1]	Phase1GCP_Appx_2009_10_12, p154, 170, 171	SampleDatabaseAsuragen_Sept2012
GCP_PHASE1	D	59	GCP1_D_59	A0056065.CEL	Mild_Sepsis	C	44	F	0.36		1	0	0	1	0	0	1	ok	Blood: non-motile gram-neg bacilli, KLEBSIELLA PNEUMONIAE	BLOOD	Blood Culture Positive [day 1]	Phase1GCP_Appx_2009_10_12, p154, 171	SampleDatabaseAsuragen_Sept2012
GCP_PHASE1	D	66	GCP1_D_66	A0056073_2.CEL	Mild_Sepsis	ASIAN	71	M	0.15	ave. of two	0	1	0	1	0	0	1	ok	Blood: negative. Urine: Escherichia coli	UTI	Gram Negative [day 1]	Phase1GCP_Appx_2009_10_12, p154, 172	SampleDatabaseAsuragen_Sept2012
GCP_PHASE1	D	67	GCP1_D_67	A0056028.CEL	Mild_Sepsis	C	46	M	0.05		0	1	1	0	0	0	1	ok	Blood: negative. SYNOVIAL FLUID (RIGHT KNEE): Streptococcus sp. (Group B)	SYNOVIUM	Gram Positive [day 1]	Phase1GCP_Appx_2009_10_12, p154, 172	SampleDatabaseAsuragen_Sept2012
GCP_PHASE1	D	68	GCP1_D_68	A0056071.CEL	Mild_Sepsis	C	68	F	1.14		0	1	0	1	1	1	1	ok	Blood: STERILE AFTER 5 DAYS INCUBATION. SUBPHRENIC ABSCESS CULTURE: gram-neg bacilli, Candida albicans. SUBPHRENIC FLUID CULTURE: gram-neg bacilli, Candida albicans, Haemophilus parainfluenzae	SUBPHRENIC ABSCESS, SUBPHRENIC FLUID	Gram Negative [day 1]	Phase1GCP_Appx_2009_10_12, p154, 172, 173	SampleDatabaseAsuragen_Sept2012
GCP_PHASE1	D	69	GCP1_D_69	A0056067.CEL	Mild_Sepsis	C	46	M	6.51		0	1	1	0	0	0	1	ok	Blood: NO GROWTH AFTER 5 DAYS INCUBATION. Left knee swab: Streptococcus pyogenes (Group A).	KNEE	Gram Positive [day 1]	Phase1GCP_Appx_2009_10_12, p154, 173, 174	SampleDatabaseAsuragen_Sept2012
GCP_PHASE1	D	72	GCP1_D_72	A0056075.CEL	Mild_Sepsis	C	73	F	1.3		0	1	1	1	0	1	1	ok	BLOOD CULTURE: STERILE AFTER 5 DAYS INCUBATION. Abdominal fluid: gram-positive cocci, gram-negative bacilli, gram-positive bacilli, Bacteroides GP (Fragilis), Eikenella corrodens, Streptococcus milleri group.	ABDOMEN	Gram Positive, Gram Negative [day 1]	Phase1GCP_Appx_2009_10_12, p154, 175	SampleDatabaseAsuragen_Sept2012
GCP_PHASE1	D	74	GCP1_D_74	A0056058.CEL	Mild_Sepsis	C	64	F	96.59		1	0	0	1	0	0	1	ok	BLOOD CULTURE: ORG 1: ESCHERICHIA COLI	BLOOD	Blood Culture Positive [day 1]	Phase1GCP_Appx_2009_10_12, p154/212	SampleDatabaseAsuragen_Sept2012
GCP_PHASE1	A	2	GCP1_MAT_2	A0056195.CEL	Mild_Sepsis	C	68	F	43.27		1	1	1	0	0	0	1	ok	BLOOD CULTURE: GRAM POSITIVE COCCI? STREPTOCOCCUS PYOGENES (Group A). TISSUE SWAB, LEFT HAND/FOREARM: Streptococcus pyogenes, Staphylococci	BLOOD, FOREARM	Gram Negative [days 2,3]	Phase1GCP_Appx_2009_10_12, p154, 177, 178	SampleDatabaseAsuragen_Sept2012
GCP_PHASE1	B	1	GCP1_B_1	A0056040.CEL	Mild_Sepsis	C	66	M	4.02		1	1	1	1	0	1	1	ok	BLOOD: one culture negative. BLOOD other culture: gram-pos cocci resembling staphylococci, gram-neg bacillus, Enterobacter cloacae, Staphylococcus aureus. URINE: ENTEROCOCCUS FAECALIS	BLOOD, UTI	Blood Culture Positive [days 2,3]	Phase1GCP_Appx_2009_10_12, p154, 178, 179	SampleDatabaseAsuragen_Sept2012
GCP_PHASE1	D	1	GCP1_D_1	A0055981.CEL	post-surgical (PS)	C	66	M	0.05		0	not checked	0	0	0	0		ok	blood: STERILE AFTER 5 DAYS INCUBATION			Phase1GCP_Appx_2009_10_12, p152, 156
GCP_PHASE1	D	2	GCP1_D_2	A0055971.CEL	post-surgical (PS)	C	65	M	0.07		0	not checked	0	0	0	0		ok	blood: STERILE AFTER 5 DAYS INCUBATION			Phase1GCP_Appx_2009_10_12, p152, 156
GCP_PHASE1	D	9	GCP1_D_9	A0055976.CEL	post-surgical (PS)	C	56	M	0.36		0	not checked	0	0	0	0		ok	blood: STERILE AFTER 5 DAYS INCUBATION			Phase1GCP_Appx_2009_10_12, p152, 156
GCP_PHASE1	D	10	GCP1_D_10	A0056172.CEL	post-surgical (PS)	C	86	M	1.22		0	not checked	0	0	0	0		ok	blood: STERILE AFTER 5 DAYS INCUBATION			Phase1GCP_Appx_2009_10_12, p152, 156
GCP_PHASE1	D	12	GCP1_D_12	A0056002.CEL	post-surgical (PS)	C	73	M	0.05		0	not checked	0	0	0	0		ok	blood: STERILE AFTER 5 DAYS INCUBATION			Phase1GCP_Appx_2009_10_12, p152, 156
GCP_PHASE1	D	14	GCP1_D_14	A0055959.CEL	post-surgical (PS)	C	56	M	0.15		0	not checked	0	0	0	0		ok	blood: STERILE AFTER 5 DAYS INCUBATION			Phase1GCP_Appx_2009_10_12, p152, 156
GCP_PHASE1	D	15	GCP1_D_15	A0055961.CEL	post-surgical (PS)	C	66	F	0.05		0	not checked	0	0	0	0		ok	blood: STERILE AFTER 5 DAYS INCUBATION			Phase1GCP_Appx_2009_10_12, p152, 156
GCP_PHASE1	D	17	GCP1_D_17	A0056009.CEL	post-surgical (PS)	C	68	M	0.05		0	not checked	0	0	0	0		ok	blood: STERILE AFTER 5 DAYS INCUBATION			Phase1GCP_Appx_2009_10_12, p152, 156
GCP_PHASE1	D	18	GCP1_D_18	A0056111.CEL	post-surgical (PS)	C	76	F	0.05		not checked	0	0	0	0	0		ok	unspecificed tissues (n=2): NO GROWTH			Phase1GCP_Appx_2009_10_12, p152, 156
GCP_PHASE1	D	19	GCP1_D_19	A0055957.CEL	post-surgical (PS)	C	84	M	0.05		0	not checked	0	0	0	0		ok	blood: STERILE AFTER 5 DAYS INCUBATION			Phase1GCP_Appx_2009_10_12, p152, 156
GCP_PHASE1	D	20	GCP1_D_20	A0055965.CEL	post-surgical (PS)	C	51	F	0.05		0	not checked	0	0	0	0		ok	blood: STERILE AFTER 5 DAYS INCUBATION			Phase1GCP_Appx_2009_10_12, p152, 157
GCP_PHASE1	D	22	GCP1_D_22	A0056000.CEL	post-surgical (PS)	C	64	M	0.05		0	not checked	0	0	0	0		ok	blood: STERILE AFTER 5 DAYS INCUBATION			Phase1GCP_Appx_2009_10_12, p152, 157
GCP_PHASE1	D	23	GCP1_D_23	A0056021.CEL	post-surgical (PS)	C	68	F	0.05		0	not checked	0	0	0	0		ok	blood: STERILE AFTER 5 DAYS INCUBATION			Phase1GCP_Appx_2009_10_12, p152, 157
GCP_PHASE1	D	24	GCP1_D_24	A0056013.CEL	post-surgical (PS)	C	68	F	7.83		0	not checked	0	0	0	0		ok	blood: STERILE AFTER 5 DAYS INCUBATION			Phase1GCP_Appx_2009_10_12, p152, 157
GCP_PHASE1	D	25	GCP1_D_25	A0056010.CEL	post-surgical (PS)	C	60	F	0.05		0	not checked	0	0	0	0		ok	blood: STERILE AFTER 5 DAYS INCUBATION			Phase1GCP_Appx_2009_10_12, p152, 157
GCP_PHASE1	D	26	GCP1_D_26	A0055977.CEL	post-surgical (PS)	C	82	M	0.05		0	not checked	0	0	0	0		ok	blood: STERILE AFTER 5 DAYS INCUBATION			Phase1GCP_Appx_2009_10_12, p152, 157
GCP_PHASE1	D	27	GCP1_D_27	A0055990.CEL	post-surgical (PS)	C	67	M	1.05		0	not checked	0	0	0	0		ok	blood: STERILE AFTER 5 DAYS INCUBATION			Phase1GCP_Appx_2009_10_12, p152, 157
GCP_PHASE1	D	28	GCP1_D_28	A0056018.CEL	post-surgical (PS)	C	80	M	0.13		0	not checked	0	0	0	0		ok	blood: STERILE AFTER 5 DAYS INCUBATION			Phase1GCP_Appx_2009_10_12, p152, 157
GCP_PHASE1	D	29	GCP1_D_29	A0055967.CEL	post-surgical (PS)	C	64	M	0.05		0	not checked	0	0	0	0		ok	blood: STERILE AFTER 5 DAYS INCUBATION			Phase1GCP_Appx_2009_10_12, p152, 157
GCP_PHASE1	D	34	GCP1_D_34	A0062721.CEL	post-surgical (PS)	C	63	M	0.05		0	not checked	0	0	0	0		ok	blood: STERILE AFTER 5 DAYS INCUBATION			Phase1GCP_Appx_2009_10_12, p152, 158
GCP_PHASE1	D	35	GCP1_D_35	A0055997.CEL	post-surgical (PS)	C	61	M	0.05		0	not checked	0	0	0	0		ok	blood: STERILE AFTER 5 DAYS INCUBATION			Phase1GCP_Appx_2009_10_12, p152, 158
GCP_PHASE1	D	36	GCP1_D_36	A0055992.CEL	post-surgical (PS)	C	57	F	0.05		0	not checked	0	0	0	0		ok	blood: STERILE AFTER 5 DAYS INCUBATION			Phase1GCP_Appx_2009_10_12, p152, 158
GCP_PHASE1	D	42	GCP1_D_42	A0056151.CEL	post-surgical (PS)	C	75	M	0.05		0	not checked	0	0	0	0		ok	blood: STERILE AFTER 5 DAYS INCUBATION			Phase1GCP_Appx_2009_10_12, p152, 159
GCP_PHASE1	D	47	GCP1_D_47	A0056023.CEL	post-surgical (PS)	C	59	F	0.05		0	not checked	0	0	0	0		ok	blood: STERILE AFTER 5 DAYS INCUBATION			Phase1GCP_Appx_2009_10_12, p152, 163
GCP_PHASE1	D	56	GCP1_D_56	A0056032.CEL	post-surgical (PS)	C	68	M	0.13		0	not checked	0	0	0	0		ok	blood: STERILE AFTER 5 DAYS INCUBATION			Phase1GCP_Appx_2009_10_12, p154, 170
GCP_PHASE1	D	58	GCP1_D_58	A0056080.CEL	post-surgical (PS)	C	66	M	0.05		0	not checked	0	0	0	0		ok	blood: STERILE AFTER 5 DAYS INCUBATION			Phase1GCP_Appx_2009_10_12, p154, 171
GCP_PHASE1	D	60	GCP1_D_60	A0056106.CEL	post-surgical (PS)	C	57	M	0.05		0	not checked	0	0	0	0		ok	blood: STERILE AFTER 5 DAYS INCUBATION			Phase1GCP_Appx_2009_10_12, p154, 171
GCP_PHASE1	D	61	GCP1_D_61	A0056153.CEL	post-surgical (PS)	C	58	M	0.05		0	not checked	0	0	0	0		ok	blood: STERILE AFTER 5 DAYS INCUBATION			Phase1GCP_Appx_2009_10_12, p154, 171
GCP_PHASE1	D	62	GCP1_D_62	A0056061.CEL	post-surgical (PS)	C	61	F	0.05		0	not checked	0	0	0	0		ok	blood: STERILE AFTER 5 DAYS INCUBATION			Phase1GCP_Appx_2009_10_12, p154, 171
GCP_PHASE1	D	63	GCP1_D_63	A0056043.CEL	post-surgical (PS)	C	58	M	0.05		0	not checked	0	0	0	0		ok	blood: STERILE AFTER 5 DAYS INCUBATION			Phase1GCP_Appx_2009_10_12, p154, 171
GCP_PHASE1	D	65	GCP1_D_65	A0056069.CEL	post-surgical (PS)	C	78	M	0.05		0	not checked	0	0	0	0		ok	blood: STERILE AFTER 5 DAYS INCUBATION			Phase1GCP_Appx_2009_10_12, p154, 172

## Sheet: KEY - Discovery Cohort
KEY - Discovery Cohort
SALMON =	SEPSIS
GREEN =	infection-negative control
GREY =	MISSING

## Sheet: line data - Validation Cohorts
Patient No.	CohortID	Readmission	Days.To.Draw	Site	Gender	Ethnicity	Age Category	Weight Category	BMI category	SIRS.criteria	SIRS.AtRisk	Days.To.Sepsis	Infection.Likelihood	Classification	Earliest.AB.start	Early.Prophylactics	qPCR.Platform	qPCR.Chemistry	qPCR.Vessel	PLA2G7	PLAC8	CEACAM4	LAMP1	SeptiCyte.Score	Score, Adjusted to TaqMan StripTube	Score, Adjusted to Asuragen StripTube	PCT	Lactate	pH	HR	HR.Min	HR.First.24h	HR.Min.24h	HR.Max.24h	Hemoglobin.Min.24h	SOFA.total	ABPm.Max.24h	Diabetes.mellitus	Lipid.lowering.drugs	Acute.renal.failure.24h	Core Temp	Core.temp.Max.24h	Core.temp.Max	Core.temp.Min.24h	Core.temp.Min	Min WBC	Max WBC	White.cell.count.Max	Glucose.Max.24h
1	1	0	0.2	1	female	white	A5	W2	N	3	NA	-0.4	culture proven	Sepsis	0.65	NA	ABI7900	TaqMan	TLDA	34.56	21.36	23.87	23.82	13.25	12.8627	10.8475	230.5	4.1	7.49	99	91	137	96	142	4.5	7	99	0	1	1	36.5	38.5	38.5	36.4	36.4	4.9	9	9	8.9
2	1	1	0.031	1	male	white	A6	W2	N	3	NA	-0.7	culture proven	Sepsis	-0.65	Early Prophylactics	ABI7900	TaqMan	TLDA	28.75	24.22	24.2	23.34	5.39	5.32577	3.31762	1.49	1	7.44	100	92	102	93	146	5.2	4	111	0	1	0	36.7	37.2	37.2	33.7	36.1	9.5	13.2	13.2	7.7
3	1	0	0.18	1	female	white	A6	W3	N	4	NA	-0.2	culture proven	Sepsis	-0.2	Early Prophylactics	ABI7900	TaqMan	TLDA	30.05	22.97	23.57	22.8	7.85	7.68466	5.6743	0.58	0.8	7.42	84	65	109	64	121	6.7	5	139	1	1	1	37.1	36.7	37.2	35.3	35.4	15.7	15.7	15.7	10.8
4	1	0	0.04	1	female	white	A7	W3	O	3	NA	-0.6	culture proven	Sepsis	-0.59	Early Prophylactics	ABI7900	TaqMan	TLDA	33.5	26.92	25.94	27.87	4.65	4.61619	2.6087	NA	0.8	7.34	NA	113	133	113	160	5.9	9	116	0	1	0	NA	36.4	36.4	35.7	36.2	28.9	28.9	28.9	8.6
5	1	0	0.17	1	female	white	A5	W3	O	4	NA	-0.4	culture proven	Sepsis	-0.38	NA	ABI7900	TaqMan	TLDA	31.41	21.81	24.08	24.38	9.3	9.07507	7.0634	48.06	3.1	7.35	112	93	121	105	129	6.5	16	104	0	0	0	38.3	40.1	39.8	38.2	36.4	10.7	12.4	12.4	11.1
6	1	0	0.07	1	female	white	A5	W3	Ob1	3	NA	-1.3	culture proven	Sepsis	-0.3	NA	ABI7900	TaqMan	TLDA	28.73	22.92	23.43	22.71	6.53	6.41892	4.40974	NA	1.4	7.42	95	91	94	91	106	8.4	2	114	0	0	0	37	37	37	36.5	36.5	19.3	19.3	19.3	8.9
7	1	0	0.042	1	male	white	A4	W3	N	3	NA	-0.7	culture proven	Sepsis	-0.74	Early Prophylactics	ABI7900	TaqMan	TLDA	29.13	20.88	24.21	23.86	8.6	8.40384	6.3928	37.5	3.6	7.37	100	80	95	80	131	6.1	6	92	1	0	0	37.6	38.5	38.5	36.7	36.6	6.7	10.2	10.2	18.1
8	1	0	0.09	1	male	white	A5	W3	O	3	NA	-0.6	culture proven	Sepsis	-0.62	NA	ABI7900	TaqMan	TLDA	33.99	22.94	26.65	25.07	12.63	12.2682	10.2535	NA	1.9	7.21	NA	82	108	82	144	NA	2	100	1	1	0	NA	36.2	36.2	36	36	NA	NA	1.2	5.6
9	1	0	0.021	1	female	white	A2	W2	N	3	NA	-0.6	probable	Sepsis	-0.58	Early Prophylactics	ABI7900	TaqMan	TLDA	28.64	25.59	24.08	24.27	2.86	2.89975	0.89388	0.1	NA	7.35	86	43	57	43	124	6.4	10	134	0	0	0	38	38	38	34.9	35	9.6	16.3	16.3	12.9
10	1	0	0.17	1	female	white	A5	W4	Ob1	3	NA	-0.2	probable	Sepsis	-0.19	NA	ABI7900	TaqMan	TLDA	31.07	23.3	25.41	25.14	8.04	7.86686	5.85632	1.6	NA	7.3	126	105	152	104	158	6.5	5	125	0	0	0	37.6	38.6	38.6	37.4	37.4	4.7	5.4	7.6	8.8
11	1	0	0.055	1	male	white	A5	W2	N	4	NA	-0.2	culture proven	Sepsis	-0.25	NA	ABI7900	TaqMan	TLDA	30.84	22.43	22.82	22.88	8.35	8.16411	6.1533	22.73	7.1	7.24	101	88	121	101	144	6.8	20	96	0	0	1	37.2	39.6	39.5	35.2	34.7	20.8	31.9	33.7	10.1
12	1	0	0.04	1	female	white	A5	W2	N	3	NA	-0.6	culture proven	Sepsis	-0.61	NA	ABI7900	TaqMan	TLDA	33.02	22.21	26.1	26.11	10.8	10.5134	8.5004	13.48	7	7.46	138	78	114	77	174	6.6	5	106	0	0	0	37	38.2	38	35.7	36	1.2	1.2	1.2	12.3
13	1	0	0.16	1	female	white	A5	W3	O	4	NA	-0.9	probable	Sepsis	-0.88	NA	ABI7900	TaqMan	TLDA	30.37	25.43	24.84	24.9	4.88	4.83673	2.82904	0.22	9.9	7.44	92	85	112	85	118	7.9	7	173	1	0	0	39.7	39.9	39.9	37.1	37.1	12	14.3	14.3	20.9
14	1	0	0.072	1	male	white	A4	W5	Ob2	3	NA	-0.9	probable	Sepsis	-0.9	NA	ABI7900	TaqMan	TLDA	30.89	25.42	23.18	23.6	5.05	4.99974	2.9919	0.34	1.5	7.35	90	72	111	73	131	9	5	87	0	0	0	36.4	38.3	38.2	35.9	35.9	9.5	11.6	11.6	8.5
15	1	0	0.0097	1	male	white	A2	W3	N	4	NA	-0.7	culture proven	Sepsis	-0.66	NA	ABI7900	TaqMan	TLDA	31.23	21.9	23.79	24.14	8.98	8.76822	6.75684	79.61	6.3	7.28	120	104	107	104	124	5.5	17	96	0	0	1	37.3	37.6	37.6	35.2	35.3	4.8	6.4	13.2	6.7
16	1	0	0.023	1	male	white	A6	W7	Ob3	4	NA	-0.8	probable	Sepsis	0.17	NA	ABI7900	TaqMan	TLDA	27.53	23.81	24.72	24.15	4.29	4.27098	2.26382	77.6	8.4	7.37	115	66	128	94	154	5.3	22	79	1	0	1	37	37.4	37.4	35.8	35.7	13.2	16.5	16.5	9.6
17	1	1	0.057	1	female	NA	A4	W3	Ob2	4	NA	0.3	culture proven	Sepsis	0.33	NA	ABI7900	TaqMan	TLDA	32.56	21.93	22.95	22.94	10.64	10.36	8.34712	4.67	4	7.31	129	76	124	84	179	6.1	13	92	0	0	0	36.1	36.9	37	34.5	34.6	13.9	18.5	18.5	6.9
18	1	0	0.042	1	male	white	A5	W4	Ob1	2	NA	-1	culture proven	Sepsis	-0.96	NA	ABI7900	TaqMan	TLDA	28.27	22.92	23.91	22.51	6.75	6.62988	4.6205	0.17	NA	7.49	67	57	70	57	102	7.6	3	133	0	1	0	36.9	39.2	39.2	36.6	36.6	2.8	3.1	3.1	6.9
19	1	1	0.1	1	male	white	A5	W3	N	4	NA	-0.4	culture proven	Sepsis	-9.4	Early Prophylactics	ABI7900	TaqMan	TLDA	31.05	23.01	24.09	23.73	8.4	8.21206	6.2012	2.44	1.1	7.36	92	79	146	87	158	5	6	110	0	0	0	36.4	37.8	37.5	35.9	35.7	15.8	19.4	23	12.5
20	1	0	0.31	1	female	white	A5	W4	Ob1	3	NA	-0.7	culture proven	Sepsis	-0.67	NA	ABI7900	TaqMan	TLDA	32.68	25.83	22.18	23.86	5.17	5.11481	3.10686	0.79	1.6	7.41	89	71	75	71	112	5.2	7	105	0	0	0	36.7	37.6	37.5	36.7	36.7	15.5	20.8	20.8	10.9
21	1	0	0.023	1	male	white	A5	W4	O	2	NA	-0.7	probable	Sepsis	-0.67	NA	ABI7900	TaqMan	TLDA	29.96	22.66	22.93	22.45	7.78	7.61754	5.60724	NA	NA	7.44	77	52	67	59	113	6.9	5	117	0	1	0	38	38	38	36.7	35.7	27.4	30.9	30.9	11.7
22	1	0	0.019	1	male	white	A6	W2	N	4	NA	-0.1	culture proven	Sepsis	-0.15	NA	ABI7900	TaqMan	TLDA	29.12	24.83	26.58	24.42	6.45	6.3422	4.3331	NA	2.2	7.44	116	80	130	80	134	6.1	15	108	0	1	0	37.2	39.1	39.1	34.4	34.4	1.8	1.8	1.8	8
23	1	0	0.082	1	male	white	A4	W3	N	2	NA	-0.9	culture proven	Sepsis	-0.87	NA	ABI7900	TaqMan	TLDA	30.85	24.04	24.59	24.8	6.6	6.48604	4.4768	12.52	2.6	7.36	66	61	69	61	98	6.3	9	137	0	1	1	36.4	37.5	37.6	36.4	36.4	2.8	6.6	15.2	7.8
24	1	0	0.072	1	male	white	A5	W3	O	3	NA	-0.4	culture proven	Sepsis	-0.44	NA	ABI7900	TaqMan	TLDA	28.49	23.3	23.72	22.71	6.2	6.10248	4.0936	10.72	4.2	7.42	55	49	84	50	106	8.1	2	137	0	0	0	36.1	39.3	39.3	35.3	35.3	9.9	13.1	13.1	12.6
25	1	0	0.012	1	female	white	A5	W4	Ob3	2	yes	NA	NA	Infection neg. control	-0.73	Early Prophylactics	ABI7900	TaqMan	TLDA	26.64	23.99	24.38	24.39	2.64	2.6888	0.68312	1.21	2.6	7.42	96	89	118	89	121	5.2	5	97	0	0	0	37.8	38	38	36.3	36.3	7.9	8.5	8.5	6.8
26	1	0	0.026	1	female	white	A2	W2	U	2	no	NA	NA	Infection neg. control	NA	NA	ABI7900	TaqMan	TLDA	28.17	25.41	24.51	24.52	2.75	2.79427	0.7885	0.07	NA	7.37	68	64	89	64	111	6.6	1	103	0	0	0	38.3	38.5	38.5	37.4	37.2	8.2	8.4	8.4	7
27	1	0	0.14	1	male	white	A5	W4	O	3	yes	NA	NA	Infection neg. control	0.016	Early Prophylactics	ABI7900	TaqMan	TLDA	32.91	26.93	26.57	26.72	5.83	5.74769	3.73914	0.09	1.2	7.44	96	68	87	68	170	6.1	7	145	1	0	0	37.9	39.1	39.1	36.1	36.1	6.1	9.9	10.6	10.3
28	1	0	0.074	1	female	white	A5	W3	O	3	yes	NA	NA	Infection neg. control	-0.51	Early Prophylactics	ABI7900	TaqMan	TLDA	27.81	24.95	22.38	23.09	2.15	2.21894	0.2137	0.05	6.4	7.33	61	52	89	52	102	6	3	125	0	1	0	32.4	35.3	37.4	31.8	31.8	14.7	21.9	21.9	13.9
29	1	0	0.042	1	male	asian	A1	W3	N	4	yes	NA	NA	Infection neg. control	-0.42	Early Prophylactics	ABI7900	TaqMan	TLDA	28.18	25.45	23.88	24.53	2.08	2.15181	0.14664	0.61	NA	7.42	81	76	101	76	118	7.4	12	109	0	0	0	36.1	36.9	37.8	35.3	35.3	7.4	12.9	12.9	7.9
30	1	0	0.094	1	male	white	A3	W3	N	4	yes	NA	NA	Infection neg. control	-0.64	Early Prophylactics	ABI7900	TaqMan	TLDA	27.97	24.95	21.07	23.12	0.97	1.08743	-0.91674	0.22	NA	7.36	67	62	66	63	152	6.4	2	116	0	0	0	37	37.3	37.3	35.6	35.7	12.8	12.8	12.8	8.8
31	1	0	0.046	1	male	white	A4	W3	O	3	no	NA	NA	Infection neg. control	NA	NA	ABI7900	TaqMan	TLDA	28.12	25.24	24	24.03	2.85	2.89016	0.8843	0.35	2.1	7.43	90	74	81	73	110	5.3	3	128	0	0	0	37.9	38	38.4	37.6	37.2	6.2	6.6	6.6	8.6
32	1	1	0.19	1	male	white	A5	W3	N	3	yes	NA	NA	Infection neg. control	-0.34	Early Prophylactics	ABI7900	TaqMan	TLDA	30.97	26.9	23.72	25.14	2.65	2.69839	0.6927	1.71	9.3	7.27	90	68	89	70	116	5.5	7	115	0	1	0	36.1	37.3	37.3	36.2	36.1	13.6	23.6	23.6	12
33	1	0	0.073	1	female	white	A5	W1	N	3	no	NA	NA	Infection neg. control	NA	NA	ABI7900	TaqMan	TLDA	28.84	25.39	22.02	23.08	2.39	2.44907	0.44362	0.65	NA	7.35	82	67	71	67	97	6.2	4	89	0	1	0	37.7	38.3	38.3	36	36	16.9	22.1	22.1	9.2
34	1	0	0.026	1	female	white	A5	W4	Ob2	4	yes	NA	NA	Infection neg. control	0.0056	Early Prophylactics	ABI7900	TaqMan	TLDA	29.92	24.82	23.73	23.99	4.84	4.79838	2.79072	21.04	6.3	7.26	122	75	76	75	134	3.6	18	117	0	1	1	36.9	37.7	37.7	33.7	33.7	11.2	14.6	14.6	15.2
35	1	0	0.0097	1	female	white	A3	W1	U	2	no	NA	NA	Infection neg. control	NA	NA	ABI7900	TaqMan	TLDA	30	26.95	22.88	25.48	0.45	0.588805	-1.4149	0.11	NA	7.34	60	58	73	58	89	6.8	2	109	0	0	0	36.1	37.3	37.3	35.7	35.7	10.2	10.2	10.2	11.1
36	1	0	0.0014	1	male	white	A5	W3	N	4	yes	NA	NA	Infection neg. control	-1	Early Prophylactics	ABI7900	TaqMan	TLDA	28.82	25.48	21.17	22.87	1.64	1.7299	-0.27488	0.46	1.3	7.4	98	58	81	58	142	5.6	4	111	0	0	0	36.1	36.7	36.7	32.8	35.5	11.1	11.1	17.1	9.6
37	1	0	0.019	1	male	white	A6	W3	O	3	no	NA	NA	Infection neg. control	NA	NA	ABI7900	TaqMan	TLDA	27.22	24.57	24.05	24.97	1.73	1.8162	-0.18866	3.53	NA	7.48	58	50	56	50	110	6.8	2	131	0	0	0	37	38.1	38.1	35.8	35.8	7.6	13.3	13.3	5.3
38	1	1	0.1	1	female	white	A5	W2	O	3	yes	NA	NA	Infection neg. control	-0.0062	Early Prophylactics	ABI7900	TaqMan	TLDA	30.78	25.89	25.37	25.79	4.47	4.44358	2.43626	0.89	NA	7.5	103	88	108	87	121	4.9	7	118	0	1	0	36.9	37.6	37.7	35.3	35.5	8	8.6	8.6	6.8
39	1	0	-0.051	1	male	white	A6	W2	N	3	no	NA	NA	Infection neg. control	NA	NA	ABI7900	TaqMan	TLDA	28.96	25.08	24.46	24.6	3.74	3.74359	1.73692	NA	NA	7.41	59	54	70	54	160	NA	3	144	0	0	0	NA	36.4	36.4	36.4	36.4	NA	NA	NA	NA
40	1	0	0.036	1	male	asian	A5	W4	Ob1	2	yes	NA	NA	Infection neg. control	-0.75	Early Prophylactics	ABI7900	TaqMan	TLDA	30.63	26.96	21.98	24.25	1.4	1.49976	-0.5048	0.09	2.3	7.33	79	73	79	73	128	7.6	5	115	1	1	0	36.5	37.1	37.2	36.3	36.3	NA	NA	NA	9.1
41	1	0	0.046	1	male	white	A6	W3	O	3	yes	NA	NA	Infection neg. control	-0.68	Early Prophylactics	ABI7900	TaqMan	TLDA	27.42	26.02	22.88	23.86	0.42	0.560038	-1.44364	2.59	1.9	7.42	70	37	41	37	84	5.2	10	133	0	0	0	36.1	36.5	36.5	31.8	31.8	13	19.7	19.7	8.6
42	1	0	0.00069	1	female	white	A6	W3	Ob1	2	yes	NA	NA	Infection neg. control	-0.51	Early Prophylactics	ABI7900	TaqMan	TLDA	30.56	26.63	26.04	25.54	4.43	4.40523	2.39794	0.09	3.8	7.4	78	41	56	41	117	5.5	5	121	1	0	0	37.6	38.1	38.1	37	37	7.7	8.1	8.1	19.4
43	1	0	0.14	1	male	white	A5	W3	N	2	yes	NA	NA	Infection neg. control	1.1	Early Prophylactics	ABI7900	TaqMan	TLDA	30.49	25.59	25.03	25.25	4.68	4.64495	2.63744	0.05	NA	7.41	57	46	62	46	92	5.7	3	133	0	0	0	35.6	35.7	35.9	33.4	33.5	7.4	8.9	8.9	8.4
44	1	0	0.12	1	female	white	A6	W4	Ob1	2	yes	NA	NA	Infection neg. control	-0.57	Early Prophylactics	ABI7900	TaqMan	TLDA	31.23	25.95	24.19	24.26	5.21	5.15317	3.14518	0.22	NA	7.45	64	58	66	57	122	4.2	4	115	0	0	0	36.5	37.2	37.3	35.3	36.1	10.3	12.3	16.2	11.4
45	1	0	0.14	1	male	white	A6	W2	N	2	yes	NA	NA	Infection neg. control	-0.65	Early Prophylactics	ABI7900	TaqMan	TLDA	27.53	24.57	24.85	24.1	3.71	3.71482	1.70818	0.78	NA	NA	62	54	88	54	112	4.3	5	98	0	0	0	36.8	37.6	37.6	36	36	NA	NA	NA	7.8
46	1	0	0.036	1	male	white	A2	W5	Ob1	3	no	NA	NA	Infection neg. control	NA	NA	ABI7900	TaqMan	TLDA	27.79	24.78	21.94	23.01	1.94	2.01757	0.01252	0.18	1	7.33	76	62	68	62	107	5.9	5	115	0	0	0	36.3	37.4	37.4	35.5	35.5	9	14.2	18.5	8.9
47	1	0	0.12	1	male	white	A4	W3	N	2	yes	NA	NA	Infection neg. control	-0.62	Early Prophylactics	ABI7900	TaqMan	TLDA	27.64	25.54	21.71	23.26	0.55	0.684695	-1.3191	0.14	2.2	7.37	40	35	50	35	81	9.1	12	106	0	0	0	33.6	34.6	37.7	32.2	33.3	10.1	15.6	15.5	11.2
48	1	0	0.017	1	male	white	A6	W3	O	2	yes	NA	NA	Infection neg. control	-0.64	Early Prophylactics	ABI7900	TaqMan	TLDA	26.2	24.34	24.19	23.57	2.48	2.53537	0.52984	2.67	1.8	7.37	90	85	90	85	108	5.1	8	115	0	1	1	37.1	37.4	37.4	36.4	36.4	12.5	12.5	12.5	11
49	1	0	0.077	1	male	white	A5	W3	N	4	yes	NA	NA	Infection neg. control	0.27	Early Prophylactics	ABI7900	TaqMan	TLDA	28.96	27.59	23.23	24.59	0.01	0.166889	-1.83642	NA	NA	7.32	57	46	76	44	149	8.1	9	150	0	0	0	36.1	37.1	37.1	35.4	35.4	12.7	15.9	15.9	12
50	1	0	0.033	1	female	white	A5	W3	O	3	yes	NA	NA	Infection neg. control	0.9	Early Prophylactics	ABI7900	TaqMan	TLDA	26.74	25.06	22.78	22.85	1.61	1.70113	-0.30362	0.05	NA	7.42	75	64	67	64	114	5.9	13	129	0	0	0	36.9	36.9	37.4	35.8	36	13.1	19.2	19.2	10.6
51	1	0	0.037	1	male	white	A5	W4	Ob1	3	no	NA	NA	Infection neg. control	NA	NA	ABI7900	TaqMan	TLDA	29.99	24.57	24.38	25.33	4.47	4.44358	2.43626	0.77	0.9	7.49	77	67	94	67	110	5.1	5	115	0	0	0	36.5	37.7	37.7	32	36.3	17.6	18.8	18.8	7.6
52	1	0	0.027	1	female	white	A4	W1	U	2	yes	NA	NA	Infection neg. control	-0.73	Early Prophylactics	ABI7900	TaqMan	TLDA	28.41	25.43	24.49	24.53	2.94	2.97647	0.97052	0.13	NA	7.41	67	63	82	63	122	6	2	118	0	0	0	37	37.5	37.5	36.8	36.8	7	7	7	6.9
53	1	0	0.016	1	female	white	A4	W5	Ob3	2	yes	NA	NA	Infection neg. control	-0.48	Early Prophylactics	ABI7900	TaqMan	TLDA	28.5	25.42	23.75	24.07	2.76	2.80386	0.79808	2.22	3.6	7.32	65	58	107	59	115	8.4	12	131	0	0	0	32.8	34.4	35.7	32.6	32.1	18.1	24.8	24.8	17.4
54	1	0	0.013	1	male	white	A3	W3	N	3	yes	NA	NA	Infection neg. control	-0.64	Early Prophylactics	ABI7900	TaqMan	TLDA	27.4	25.07	25.86	25.6	2.59	2.64085	0.63522	0.66	NA	7.4	75	71	84	71	114	6.1	2	141	0	0	0	36.9	38.7	38.7	36.6	36.6	5.6	9.4	9.4	5.3
55	1	0	0.034	1	female	white	A5	W3	Ob1	3	no	NA	NA	Infection neg. control	NA	NA	ABI7900	TaqMan	TLDA	27.2	24.16	24.19	23.97	3.26	3.28331	1.27708	0.98	0.7	7.3	60	48	87	48	120	5.2	5	133	0	0	0	36.6	37.7	38.6	35.6	35.8	10	15.5	15.5	10.7
56	1	0	0.04	1	female	white	A7	W3	O	2	no	NA	NA	Infection neg. control	NA	NA	ABI7900	TaqMan	TLDA	29.69	26.04	25.82	26.18	3.29	3.31208	1.30582	0.09	NA	7.47	59	53	65	53	76	6.8	0	116	0	0	0	36.4	36.8	36.8	34.5	36	16	16	16	6.9
57	1	0	0.066	1	male	white	A4	W3	N	2	yes	NA	NA	Infection neg. control	-0.94	Early Prophylactics	ABI7900	TaqMan	TLDA	30.65	24.64	24.57	24.64	5.94	5.85317	3.84452	NA	2.7	7.57	77	68	86	68	96	7	11	93	0	0	0	37.1	37.2	37.2	36.6	36.6	15.1	16.3	16.3	12.1
58	1	0	0.11	1	male	white	A4	W4	O	3	yes	NA	NA	Infection neg. control	0.24	Early Prophylactics	ABI7900	TaqMan	TLDA	28.13	24.75	24.58	23.82	4.14	4.12715	2.12012	NA	NA	7.49	99	55	98	65	117	5.1	12	127	0	0	0	37.5	38	38	35.6	35.7	6.4	7.2	7.2	9.4
59	1	0	0.058	1	male	white	A6	W2	N	3	no	NA	NA	Infection neg. control	NA	NA	ABI7900	TaqMan	TLDA	28.16	25.29	24.28	24.49	2.66	2.70797	0.70228	0.11	NA	7.46	77	60	67	60	90	5.6	4	141	1	0	0	37.1	37.5	37.5	35.2	35.2	10.6	14.8	14.8	8.8
60	2	0	0.64	1	male	white	A4	W4	Ob1	3	NA	-0.9	possible	Indeterminate	0.14	NA	ABI7500-FastDx	TaqMan	strip tube	32.86	22.88	24.47	24.06	10.39	10.39	8.37661	NA	2.4	7.45	85	84	103	85	105	5.6	19	104	0	0	1	36.7	38.5	38.5	38.3	36.7	14.9	17.9	17.9	12.1
61	2	0	-0.00069	1	male	white	A6	W4	Ob1	2	NA	1.5	possible	Indeterminate	1.5	NA	ABI7500-FastDx	TaqMan	strip tube	28.28	24.65	23.86	23.62	3.87	3.87	1.86313	0.14	NA	7.48	61	47	76	47	92	8.4	6	154	0	1	0	37.5	37.8	37.8	36.3	36.6	14.8	17.2	17.2	10.1
62	2	0	0.42	2	female	white	A6	W4	Ob1	4	NA	0	possible	Indeterminate	0.012	Early Prophylactics	ABI7500-FastDx	TaqMan	strip tube	30.96	25.7	24.5	24.4	5.36	5.36	3.35164	NA	1.3	7.35	86	63	75	59	107	9.1	NA	105	0	0	0	NA	NA	NA	NA	NA	13.1	15.8	15.8	8.5
63	2	0	0.14	2	male	white	A4	W3	N	2	NA	-0.5	possible	Indeterminate	-0.53	NA	ABI7500-FastDx	TaqMan	strip tube	28.86	24.85	23.75	24.58	3.18	3.18	1.17382	NA	3.2	7.16	73	52	132	NA	134	6.5	8	100	0	0	0	36.6	38	37	35	33.8	21.7	21.7	21.7	12.9
64	2	0	0.8	2	male	black	A5	W2	N	4	NA	-1.9	possible	Indeterminate	-0.91	NA	ABI7500-FastDx	TaqMan	strip tube	32.76	26.42	24.46	25.36	5.44	5.44	3.43156	NA	1.4	NA	87	71	111	67	111	5	8	122	0	0	0	37.2	39.4	38.4	36.7	35.7	14.5	14.5	14.5	7
65	2	1	0.35	2	male	white	A6	W2	N	3	NA	-0.7	possible	Indeterminate	-0.73	NA	ABI7500-FastDx	TaqMan	strip tube	33.2	22.95	25.11	26.62	8.74	8.74	6.72826	5	2.9	7.3	71	55	136	53	136	4.5	11	106	0	0	0	36.3	38.4	37.5	35.4	33.9	3.9	8.2	8.2	6
66	2	0	0.52	2	female	white	A4	W2	N	4	NA	-1.9	probable	Sepsis	0.13	NA	ABI7500-FastDx	TaqMan	strip tube	32.31	23.46	23.69	23.77	8.77	8.77	6.75823	NA	3.4	NA	112	87	105	85	115	5.6	11	79	0	0	0	37.1	37.9	38	35.5	33.8	50.5	52.7	52.7	27.7
67	2	0	0.46	2	female	black	A3	W3	Ob1	3	NA	-0.3	probable	Sepsis	-0.29	NA	ABI7500-FastDx	TaqMan	strip tube	31.07	24.65	23.01	23.85	5.58	5.58	3.57142	NA	5.8	7.36	51	47	84	46	99	6.2	11	100	0	1	1	NA	33.9	NA	33.9	NA	12.2	12.5	12.5	11.1
68	2	0	0.01	2	male	white	A6	W4	Ob1	3	NA	-0.9	probable	Sepsis	-0.86	NA	ABI7500-FastDx	TaqMan	strip tube	29.11	23.96	24.47	23.51	6.11	6.11	4.10089	NA	2.1	7.46	98	83	99	81	125	7.1	NA	125	0	0	0	37.6	38.3	38.4	37.3	34.3	9.5	11.8	11.8	8
69	2	0	0.017	1	male	white	A5	W4	Ob1	3	yes	NA	NA	Infection neg. control	-0.76	Early Prophylactics	ABI7500-FastDx	TaqMan	strip tube	27.79	25.32	23.22	23.45	2.24	2.24	0.23476	1.88	4.5	7.28	63	59	83	59	99	6.5	16	104	0	0	0	34	34.7	36.2	31.5	31.5	11.3	14.3	14.3	11.7
70	2	0	0.028	1	male	white	A6	W3	O	3	no	NA	NA	Infection neg. control	NA	NA	ABI7500-FastDx	TaqMan	strip tube	29.95	26.13	24.27	25.58	2.51	2.51	0.50449	0.52	NA	7.41	70	67	80	67	111	7	5	139	0	0	0	36.8	38.1	38	36	36	9.1	17.2	17.2	8.8
71	2	0	0.75	1	male	white	A4	W2	N	2	no	NA	NA	Infection neg. control	NA	NA	ABI7500-FastDx	TaqMan	strip tube	32.77	23.45	26.17	26.53	8.96	8.96	6.94804	NA	NA	NA	67	54	78	54	172	4.7	3	102	0	0	0	NA	NA	NA	NA	NA	12.3	12.3	12.3	6.8
72	2	0	0.18	1	male	white	A4	W3	N	4	yes	NA	NA	Infection neg. control	0.065	Early Prophylactics	ABI7500-FastDx	TaqMan	strip tube	29.74	25.67	24.09	24.12	4.04	4.04	2.03296	NA	17.2	6.92	75	57	92	57	113	4.3	22	129	0	0	1	35.2	36.5	36.5	35.6	33.6	14	18.1	18.1	14.1
73	2	0	0.042	1	male	white	A4	W4	Ob1	3	yes	NA	NA	Infection neg. control	0.22	Early Prophylactics	ABI7500-FastDx	TaqMan	strip tube	30.03	24.31	23.05	26.26	2.51	2.51	0.50449	2.29	5.4	7.42	103	97	115	97	125	5.2	16	115	1	1	0	36.9	37	36.9	36.5	36.5	11.6	18.8	18.8	11.1
74	2	0	0.049	1	male	white	A3	W4	O	3	yes	NA	NA	Infection neg. control	0.0076	Early Prophylactics	ABI7500-FastDx	TaqMan	strip tube	30.37	21.11	24.45	22.9	10.81	10.81	8.79619	20.96	10.5	7.26	123	67	125	67	144	5.1	13	110	0	0	1	37.8	37.9	37.9	35.5	35.5	6.9	10.7	10.7	17.6
75	2	0	0.039	1	male	white	A5	W3	N	3	yes	NA	NA	Infection neg. control	-0.94	Early Prophylactics	ABI7500-FastDx	TaqMan	strip tube	28.97	23.77	23.82	24.76	4.26	4.26	2.25274	0.63	NA	7.37	66	64	66	64	80	4.8	4	78	0	0	0	37.8	38.5	38.5	37.3	37.3	17.1	20.7	20.7	7.3
76	2	0	1	1	male	white	A5	W3	O	4	yes	NA	NA	Infection neg. control	-0.66	Early Prophylactics	ABI7500-FastDx	TaqMan	strip tube	30.49	23.98	23.59	23.92	6.18	6.18	4.17082	2.09	10.2	7.31	93	86	96	86	117	7	11	105	0	0	0	336.5	37	336.5	35.6	35.6	17.9	18.2	18.2	14.4
77	2	0	0.068	1	male	white	A1	W2	N	3	yes	NA	NA	Infection neg. control	-0.33	Early Prophylactics	ABI7500-FastDx	TaqMan	strip tube	28.05	24.77	24.18	23.17	4.29	4.29	2.28271	9.3	NA	7.42	45	41	85	42	121	7.5	9	191	0	0	0	37	38.1	37.9	35.5	36	18.4	25.7	25.7	16.4
78	2	0	0.032	1	male	white	A4	W3	O	4	yes	NA	NA	Infection neg. control	0.37	Early Prophylactics	ABI7500-FastDx	TaqMan	strip tube	31.85	25.46	25.21	26.45	5.15	5.15	3.14185	1.34	3.1	7.33	117	101	105	101	154	5.5	5	104	1	0	0	37.8	38.8	38.8	37.3	37.3	9.8	13.8	13.8	8
79	2	0	0.067	1	male	white	A5	W3	O	2	yes	NA	NA	Infection neg. control	-0.86	Early Prophylactics	ABI7500-FastDx	TaqMan	strip tube	31.13	24.15	23.03	23.35	6.66	6.66	4.65034	0.59	5.7	7.41	96	88	92	88	111	8.2	16	99	0	0	0	37	37.2	37.2	36.7	36.7	6.2	9.4	9.4	14
80	2	0	0.073	1	male	white	A5		NA	3	no	NA	NA	Infection neg. control	NA	NA	ABI7500-FastDx	TaqMan	strip tube	29.39	24.67	21.5	22.91	3.31	3.31	1.30369	0.04	NA	7.47	73	64	92	65	107	8	3	125	0	0	0	36.4	37.3	37.3	36.3	36.3	10.3	12.6	12.6	8.6
81	2	0	0.067	1	male	white	A1	W3	N	2	yes	NA	NA	Infection neg. control	0.042	Early Prophylactics	ABI7500-FastDx	TaqMan	strip tube	29.86	26.04	23.87	25.85	1.84	1.84	-0.16484	14.54	1.6	7.47	71	45	56	45	154	7.8	8	138	0	0	0	37.4	38.7	38.7	35.1	35.1	11.1	11.6	11.6	8.7
82	2	0	0.036	1	male	white	A5	W3	O	4	yes	NA	NA	Infection neg. control	-0.51	Early Prophylactics	ABI7500-FastDx	TaqMan	strip tube	32.01	27.18	22.18	25.07	1.94	1.94	-0.06494	NA	NA	NA	92	78	79	78	101	7	0	122	0	1	0	36.6	37.1	37.1	34.7	35.6	17.1	17.1	17.1	9.5
83	2	0	0.05	1	female	white	A4	W2	N	4	yes	NA	NA	Infection neg. control	-0.84	Early Prophylactics	ABI7500-FastDx	TaqMan	strip tube	29.25	24.77	24.29	24.33	4.44	4.44	2.43256	1.34	2.6	7.26	106	91	97	91	128	6.3	8	122	0	1	0	36.5	37.4	37.4	34.5	35	7.6	15.2	15.2	11.6
84	2	0	0.48	2	female	white	A3	W4	Ob1	4	yes	NA	NA	Infection neg. control	0.14	Early Prophylactics	ABI7500-FastDx	TaqMan	strip tube	30.82	26.1	25.69	26.54	3.87	3.87	1.86313	NA	5.1	NA	81	74	104	73	127	8.2	9	240	0	0	0	37.5	39.1	38.1	37	33.8	15.4	19.5	19.5	19.6
85	2	0	0.15	2	female	white	A7	W2	N	2	no	NA	NA	Infection neg. control	NA	NA	ABI7500-FastDx	TaqMan	strip tube	30.89	26.93	25.3	26.87	2.39	2.39	0.38461	0.05	4.1	7.54	89	39	68	38	99	7.8	NA	114	0	0	0	38.3	38.5	38.5	35	35	10.3	10.3	10.3	10.5
86	2	0	0.042	2	female	white	A5	W3	Ob2	3	no	NA	NA	Infection neg. control	NA	NA	ABI7500-FastDx	TaqMan	strip tube	31.4	24.14	24.46	25.23	6.49	6.49	4.48051	NA	4.3	NA	NA	32	124	NA	136	6.8	11	77	0	0	0	NA	36.5	NA	36.3	NA	23.4	23.4	23.4	9.8
87	2	0	0.36	2	female	white	A1	W4	Ob2	2	yes	NA	NA	Infection neg. control	-0.39	Early Prophylactics	ABI7500-FastDx	TaqMan	strip tube	31.33	27.22	24.67	25.78	3	3	0.994	NA	3.9	7.45	75	59	88	58	111	5.8	5	115	0	0	0	35.9	36.1	36.7	34.7	34	11.8	13.3	13.3	8
88	2	0	-0.21	2	male	white	A6	W4	Ob2	3	yes	NA	NA	Infection neg. control	-0.21	NA	ABI7500-FastDx	TaqMan	strip tube	26.88	24.54	23.21	22.84	2.71	2.71	0.70429	NA	2.1	7.35	64	45	69	40	105	8.1	NA	115	0	0	0	39	40.2	39.3	37	35	8.9	12.8	12.8	11.5
89	2	0	0.19	2	female	white	A5	W2	N	2	no	NA	NA	Infection neg. control	NA	NA	ABI7500-FastDx	TaqMan	strip tube	29.44	24.83	24.41	23.95	5.07	5.07	3.06193	NA	1.3	7.46	95	63	79	52	104	6	6	136	0	0	0	37.6	38.7	37.7	37	34.4	7.7	10.1	10.1	8.2
90	2	0	-0.099	2	male	white	A6	W4	O	2	yes	NA	NA	Infection neg. control	-0.099	Early Prophylactics	ABI7500-FastDx	TaqMan	strip tube	29.76	25.08	24.73	24.54	4.87	4.87	2.86213	NA	3	7.33	96	42	164	36	164	8.8	6	223	0	0	0	NA	38.8	NA	37.6	NA	14.4	16	16	10
91	2	0	0.29	2	female	white	A1	W2	N	3	yes	NA	NA	Infection neg. control	-0.77	Early Prophylactics	ABI7500-FastDx	TaqMan	strip tube	29.97	24.43	23.17	22.93	5.78	5.78	3.77122	NA	1.1	NA	88	77	97	74	119	7.4	0	137	0	0	0	NA	NA	NA	NA	NA	13.6	17.3	17.3	7.6
92	2	0	0.19	2	male	white	A4	W3	N	3	yes	NA	NA	Infection neg. control	-0.44	Early Prophylactics	ABI7500-FastDx	TaqMan	strip tube	29.47	24.67	23.15	23.5	4.45	4.45	2.44255	4.48	3.4	7.23	86	56	82	55	112	7.3	14	104	0	0	1	36.5	36.8	37.4	32.1	32	21.5	25.2	25.2	13.8
93	2	0	-0.017	2	male	white	A4	W3	O	4	no	NA	NA	Infection neg. control	NA	NA	ABI7500-FastDx	TaqMan	strip tube	29.74	24.56	23.47	24.88	3.77	3.77	1.76323	NA	6.8	7.2	89	81	89	81	105	8	NA	85	0	0	0	38	36.9	38.1	36.9	36.9	14	15.9	15.9	12.5
94	2	0	0.18	2	male	white	A5	W3	N	3	yes	-0.7	none	Infection neg. control*	-0.73	NA	ABI7500-FastDx	TaqMan	strip tube	33.82	24.64	26.58	25.04	10.72	10.72	8.70628	NA	1.2	NA	99	90	126	70	126	4.3	NA	111	1	1	0	NA	38.9	NA	38.3	NA	29.9	29.9	29.9	16.6
95	2	0	0.077	2	male	white	A6	W4	Ob2	4	yes	-1.5	none	Infection neg. control*	-0.46	NA	ABI7500-FastDx	TaqMan	strip tube	32.99	21.89	23.48	23.77	10.81	10.81	8.79619	165.7	3.8	7.32	107	95	100	92	135	7	9	82	1	1	0	36.9	38.8	NA	36.7	NA	32.6	32.6	32.6	11.9
96	3	0	0.081	1	male	white	A5	W3	O	2	NA	-1	probable	Sepsis	-1	NA	ABI7500-FastDx	TaqMan	strip tube	28.7933	23.4117	25.0085	23.4021	6.988	6.988	4.97801	1.19	0.9	7.41	68	64	70	63	106	5.9	6	104	1	1	0	36.8	38.3	38.3	36.6	36.4	9.2	11	11	10.6
97	3	0	0.12	1	female	white	A3	W2	N	3	NA	0.1	probable	Sepsis	0.094	NA	ABI7500-FastDx	TaqMan	strip tube	32.436	23.3781	25.3287	25.4926	8.894	8.894	6.88211	NA	12.9	7.19	156	84	152	84	176	3.9	12	128	1	1	1	36.6	37.1	37.1	34.5	34.5	3.7	6.8	6.8	16.3
98	3	0	0.068	1	female	white	A4	W2	N	4	NA	-0.3	probable	Sepsis	-0.33	NA	ABI7500-FastDx	TaqMan	strip tube	32.4964	21.4579	23.9667	23.2899	11.7153	11.7153	9.70058	16.42	2.2	7.32	105	92	117	92	133	6.6	9	104	0	0	1	37.3	38	38	36.8	36.8	23.3	23.3	25.9	6.6
99	3	0	-0.19	2	female	white	A3	W3	O	3	NA	-0.2	culture proven	Sepsis	-0.19	NA	ABI7500-FastDx	TaqMan	strip tube	31.0156	22.2272	22.2324	23.6456	7.3752	7.3752	5.36482	13.67	1.7	NA	111	90	137	73	138	3.4	12	90	0	0	0	37.2	35.3	37.4	35	34.3	6.5	6.5	21.1	7
100	3	0	0.59	2	female	white	A4	W2	O	4	NA	-0.8	culture proven	Sepsis	-0.81	NA	ABI7500-FastDx	TaqMan	strip tube	34.1872	23.6551	22.6361	23.2455	9.9227	9.9227	7.90978	12.51	2.2	NA	86	64	105	70	112	6	6	127	0	0	0	NA	36	NA	35.9	NA	20	20	20	10.3
101	3	0	0.035	1	female	white	A6	W2	O	4	NA	-1	culture proven	Sepsis	-0.03	NA	ABI7500-FastDx	TaqMan	strip tube	32.6366	23.009	24.8635	24.6874	9.8037	9.8037	7.7909	48.45	4.3	7.18	126	111	125	112	138	4.5	15	104	0	1	1	36.6	37.3	37.2	34.8	35	1.6	2.2	20.9	6.8
102	3	0	0.66	1	male	white	A3	W3	N	2	NA	-0.9	probable	Sepsis	0.12	NA	ABI7500-FastDx	TaqMan	strip tube	29.3836	22.7765	23.6059	23.5698	6.6432	6.6432	4.63356	22.9	25.9	7.27	72	66	99	66	112	8.6	13	106	0	0	0	36.8	36.9	36.9	35.9	36	18.1	20	20	16.9
103	3	0	0.052	1	male	white	A2	W4	O	2	NA	-0.6	culture proven	Sepsis	-0.57	NA	ABI7500-FastDx	TaqMan	strip tube	30.7532	24.0853	25.0107	24.3052	7.3734	7.3734	5.36303	9.52	3.4	7.08	113	99	105	99	129	7.8	15	94	1	1	1	36.7	37.9	37.9	35	36	3.2	8.2	8.2	9.7
104	3	1	0.054	1	female	white	A5	W3	Ob1	2	NA	-1	culture proven	Sepsis	-1	NA	ABI7500-FastDx	TaqMan	strip tube	32.8963	23.6696	25.0169	24.6051	9.6385	9.6385	7.62586	2.48	2.8	7.48	75	61	102	61	114	5.2	4	98	1	1	0	36.5	38.7	38.7	35.8	35.8	21.1	21.9	21.9	11.2
105	3	1	0.22	2	male	white	A5	W3	N	4	NA	-0.8	probable	Sepsis	-0.8	NA	ABI7500-FastDx	TaqMan	strip tube	32.8342	27.0022	24.987	25.3766	5.4424	5.4424	3.43396	0.48	2.9	7.39	96	71	92	67	130	5.7	8	92	0	0	1	35.7	36	36.7	35.7	33.1	13.1	16.1	16.1	11.4
106	3	1	0.67	2	male	white	A5	W4	O	3	NA	-1.5	probable	Sepsis	-0.54	NA	ABI7500-FastDx	TaqMan	strip tube	31.8688	25.9925	26.8397	25.7116	7.0044	7.0044	4.9944	0.13	1.8	NA	96	74	95	71	141	5.9	6	145	0	1	0	40	40	40.1	36	35.2	8.5	10.2	10.2	8.5
107	3	0	0.31	2	female	white	A5	W2	N	3	NA	-2.4	culture proven	Sepsis	-0.44	NA	ABI7500-FastDx	TaqMan	strip tube	31.628	24.0605	25.5077	24.5143	8.5609	8.5609	6.54934	0.45	1.5	7.24	103	81	118	89	121	7.9	4	179	0	1	0	37	NA	NA	NA	NA	12.3	17.6	17.6	8.8
108	3	0	0.043	2	male	white	A5	W4	Ob2	3	NA	-0.6	culture proven	Sepsis	-0.62	NA	ABI7500-FastDx	TaqMan	strip tube	31.8564	23.0815	26.1107	25.0574	9.8282	9.8282	7.81537	32.03	9.8	NA	100	80	133	75	156	7.8	12	88	0	1	0	36.4	35.7	37	35.6	33.2	4.2	4.8	4.8	12.3
109	3	0	0.1	2	male	white	A4	W3	O	3	NA	-0.8	culture proven	Sepsis	-0.8	NA	ABI7500-FastDx	TaqMan	strip tube	31.5732	21.8448	24.9815	23.3898	11.3201	11.3201	9.30578	146.9	1.5	NA	122	116	132	116	154	7.8	8	104	0	0	0	34.9	38	38	34.5	34.4	3	5.8	5.8	9.1
110	3	0	0.19	2	male	black	A3	W4	O	3	NA	-1.5	probable	Sepsis	-0.52	NA	ABI7500-FastDx	TaqMan	strip tube	30.6303	21.1892	25.5121	22.9823	11.9709	11.9709	9.95593	32.36	2.9	NA	111	100	126	102	130	8.3	6	102	0	0	1	38.4	39.5	39.6	38.1	36.1	9.1	9.2	9.2	6.6
111	3	0	0.77	2	male	white	A6	W4	O	2	NA	-0.9	culture proven	Sepsis	-0.86	NA	ABI7500-FastDx	TaqMan	strip tube	30.7066	24.9425	23.9894	23.8138	5.9397	5.9397	3.93076	0.4	2.2	7.49	57	42	100	NA	100	NA	5	110	0	1	0	37.5	38.2	38.2	35.5	35.5	12.9	14.9	14.9	14.3
112	3	0	0.38	2	female	white	A4	W5	Ob3	3	NA	0	culture proven	Sepsis	-0.038	NA	ABI7500-FastDx	TaqMan	strip tube	28.425	21.7316	22.6575	22.9353	6.4156	6.4156	4.40618	12.11	0.7	NA	124	84	102	84	142	4	11	93	0	0	0	37.3	37.4	37.4	34.7	34.7	12.7	13.5	19.8	5.8
113	3	1	0.37	2	female	white	A4	W5	Ob3	3	NA	-0.1	probable	Sepsis	-0.12	NA	ABI7500-FastDx	TaqMan	strip tube	28.918	23.0326	24.164	22.9876	7.0618	7.0618	5.05174	0.83	1.5	7.53	105	69	151	45	151	4.8	11	94	1	0	1	NA	38.1	NA	37.7	NA	15.1	15.1	30.3	8.6
114	3	0	0.39	2	female	asian	A3	W2	N	2	NA	-0.1	culture proven	Sepsis	-0.069	NA	ABI7500-FastDx	TaqMan	strip tube	32.4479	24.3765	22.5151	23.6105	6.976	6.976	4.96602	34.78	8.5	NA	73	41	47	41	80	3.6	15	86	1	0	1	NA	32.1	NA	29	NA	7.5	7.5	18	13.9
115	3	0	0.24	2	male	black	A2	W1	U	2	NA	-0.5	culture proven	Sepsis	-0.53	NA	ABI7500-FastDx	TaqMan	strip tube	29.2614	23.3492	25.0072	23.978	6.9414	6.9414	4.93146	2.37	2.6	7.45	129	90	140	90	176	5.2	6	83	0	0	0	37.9	38.9	38	36.3	34.3	3.1	10.5	10.5	9.6
116	3	0	0.087	2	male	black	A5	W3	O	4	NA	-0.7	probable	Sepsis	-0.7	NA	ABI7500-FastDx	TaqMan	strip tube	28.5883	22.7073	24.8146	23.2957	7.3999	7.3999	5.3895	93.3	5.4	NA	89	84	127	83	191	7.8	4	185	1	0	0	36.1	36.7	NA	36.1	NA	13.2	13.6	13.6	10.1
117	3	0	0.72	2	male	white	A4	W3	N	2	NA	-1	culture proven	Sepsis	-0.027	NA	ABI7500-FastDx	TaqMan	strip tube	32.9045	22.9504	25.1908	24.1354	11.0095	11.0095	8.99549	62.09	2	7.29	80	70	136	69	136	7.1	10	126	1	1	0	NA	38.4	NA	38.1	NA	4	8	8	32.6
118	3	0	0.06	2	male	white	A5	W3	O	4	NA	-2.8	culture proven	Sepsis	0.23	NA	ABI7500-FastDx	TaqMan	strip tube	33.0467	22.2214	24.9729	23.912	11.8862	11.8862	9.87131	2.8	1.6	7.4	120	105	123	110	140	4.6	8	87	0	0	0	37.5	39.8	38.8	38.3	35.2	16.6	19.4	19.4	8.5
119	3	0	0.44	2	male	white	A6	W2	N	3	NA	-0.6	culture proven	Sepsis	-0.56	NA	ABI7500-FastDx	TaqMan	strip tube	32.6285	22.0641	23.2216	23.3817	10.4043	10.4043	8.3909	63.66	2.5	7.41	107	91	98	90	114	7.1	7	102	0	0	0	36.1	36.6	36.8	34.9	34.9	2.6	7.4	7.4	9
120	3	1	0.6	2	male	white	A4	W3	O	4	NA	-0.6	culture proven	Sepsis	-0.61	NA	ABI7500-FastDx	TaqMan	strip tube	31.2666	23.3792	25.0298	23.9035	9.0137	9.0137	7.00169	1.56	2.5	NA	75	61	121	66	133	4.3	7	123	0	0	0	36.4	40.6	40.8	35.6	NA	17.2	17.2	17.2	16.6
121	3	0	0.49	2	male	black	A3	W2	N	2	NA	0.1	culture proven	Sepsis	0.11	NA	ABI7500-FastDx	TaqMan	strip tube	29.1148	23.9892	23.4552	23.7746	4.8062	4.8062	2.79839	NA	1.7	7.49	74	65	94	64	109	8.2	1	110	0	0	0	35	38.3	37.3	35.8	34	5.7	7	7	7.8
122	3	0	0.45	2	female	white	A6	W2	O	3	NA	-2	culture proven	Sepsis	0.033	NA	ABI7500-FastDx	TaqMan	strip tube	31.2501	24.7573	24.9847	25.1605	6.317	6.317	4.30768	0.76	1.4	7.25	57	53	117	52	117	7.3	8	96	0	0	0	36.9	38.6	37.8	36.9	33.7	11.5	11.5	11.5	9.3
123	3	0	0.19	2	female	white	A3	W3	O	3	NA	-0.9	probable	Sepsis	-0.9	NA	ABI7500-FastDx	TaqMan	strip tube	34.3335	26.1796	24.8456	26.003	6.9965	6.9965	4.9865	7.77	3.9	NA	72	71	84	71	145	5.5	11	77	0	0	0	35.5	37.1	37.1	35.1	34.9	10.6	12.5	12.5	10.6
124	3	0	0.29	2	male	white	A4	W3	N	3	NA	1.8	culture proven	Sepsis	1.8	NA	ABI7500-FastDx	TaqMan	strip tube	27.2736	23.2027	25.9031	24.1663	5.8077	5.8077	3.79889	0.09	11.1	NA	90	82	137	81	161	7.6	8	97	0	0	0	37.5	39.2	38.8	36.4	35.3	8.4	8.4	10.4	16.2
125	3	0	0.042	1	male	white	A5	W2	O	2	yes	NA	NA	Infection neg. control	-0.44	Early Prophylactics	ABI7500-FastDx	TaqMan	strip tube	30.318	26.4529	23.9019	25.2898	2.4772	2.4772	0.471723	0.53	3.4	7.46	99	95	100	95	104	5.5	0	143	0	1	0	36.9	36.9	37.3	36.7	36.7	5.7	7.9	7.9	11.4
126	3	0	0.086	1	female	white	A1	W2	N	2	no	NA	NA	Infection neg. control	NA	NA	ABI7500-FastDx	TaqMan	strip tube	28.7235	25.7171	25.1746	24.8276	3.3534	3.3534	1.34705	0.11	1.4	7.22	101	92	105	92	123	8.8	0	109	1	0	0	37.7	37.7	37.7	35.5	35.5	9.5	9.5	9.5	19.9
127	3	0	0.65	2	male	white	A5	W2	N	2	yes	NA	NA	Infection neg. control	0.21	Early Prophylactics	ABI7500-FastDx	TaqMan	strip tube	29.4294	25.2472	23.0095	23.6646	3.5271	3.5271	1.52057	0.21	2.5	7.29	77	56	97	53	111	7.8	4	132	0	0	0	35.9	37.4	37.5	34.1	33.8	7.9	12	12	10.6
128	3	0	0.025	1	female	white	A6	W1	U	3	no	NA	NA	Infection neg. control	NA	NA	ABI7500-FastDx	TaqMan	strip tube	29.2341	22.9226	22.9997	23.8127	5.4985	5.4985	3.49	0.39	1.4	7.26	96	67	85	67	134	6.8	4	128	0	0	0	37.7	37.8	37.8	35.6	35.6	5.5	5.5	5.5	9
129	3	0	0.068	1	female	white	A1	W2	N	4	yes	NA	NA	Infection neg. control	-0.42	Early Prophylactics	ABI7500-FastDx	TaqMan	strip tube	29.3486	26.6623	23.7759	24.7906	1.6716	1.6716	-0.333072	0.02	2.9	7.42	75	56	82	58	124	7.1	4	125	0	0	0	36.5	37.5	37.5	34.6	34.6	12.3	21.3	21.3	7.8
130	3	0	0.092	1	female	white	A3	W2	N	3	no	NA	NA	Infection neg. control	NA	NA	ABI7500-FastDx	TaqMan	strip tube	28.9813	25.327	26.08	25.1361	4.5982	4.5982	2.5906	NA	2.1	7.32	91	68	103	68	120	7.6	3	156	0	0	0	35	35.7	35.7	30.3	34.9	6.8	6.8	6.8	4.6
131	3	0	0.0021	1	female	white	A4	W3	N	3	yes	NA	NA	Infection neg. control	-0.85	Early Prophylactics	ABI7500-FastDx	TaqMan	strip tube	28.1603	24.4875	24.8441	24.7585	3.7584	3.7584	1.75164	0.41	1.4	7.41	NA	NA	82	77	110	5	3	104	0	0	0	NA	38.3	NA	36.9	NA	7.7	10.4	10.4	8.8
132	3	0	0.06	1	female	white	A4	W3	O	4	no	NA	NA	Infection neg. control	NA	NA	ABI7500-FastDx	TaqMan	strip tube	28.6815	24.5694	23.8355	23.5882	4.3594	4.3594	2.35204	0.64	4.6	7.45	NA	88	100	88	120	7.8	10	115	0	0	0	NA	37.2	37.2	35.4	35.4	15.5	20.2	20.2	12
133	3	0	0.11	1	male	white	A6	W4	Ob1	4	yes	NA	NA	Infection neg. control	-0.63	Early Prophylactics	ABI7500-FastDx	TaqMan	strip tube	28.8145	25.3642	23.1096	23.977	2.5829	2.5829	0.577317	4.68	9.7	7.22	51	44	100	44	149	6.8	11	113	1	1	0	30	34.4	34.4	31.5	30	12.7	15.4	15.4	23.3
134	3	0	0.084	1	female	white	A3	W2	N	4	yes	NA	NA	Infection neg. control	-0.83	Early Prophylactics	ABI7500-FastDx	TaqMan	strip tube	30.6573	25.8676	23.5171	24.2238	4.083	4.083	2.07592	0.13	NA	7.32	103	45	63	45	115	8.3	9	108	0	0	0	37.4	37.6	37.6	34.6	34.6	14.6	16.3	16.3	9.1
135	3	0	0.25	1	male	white	A4	W3	N	3	no	NA	NA	Infection neg. control	NA	NA	ABI7500-FastDx	TaqMan	strip tube	31.5555	26.9369	23.5799	25.3978	2.8007	2.8007	0.794899	0.61	1.8	7.36	47	41	81	41	92	6	1	110	1	1	0	35.8	37.4	37.4	35.3	35.3	15	18	18	11.1
136	3	0	0.027	1	male	white	A4	W4	Ob1	2	no	NA	NA	Infection neg. control	NA	NA	ABI7500-FastDx	TaqMan	strip tube	30.6206	27.0681	25.017	25.5473	3.0222	3.0222	1.01618	0.07	2.4	7.41	73	69	70	68	103	5.9	3	175	0	0	0	37.1	38.2	38.2	35.8	35.8	8.9	10.9	10.9	8.8
137	3	0	0.0069	1	female	white	A4	W7	Ob3	2	no	NA	NA	Infection neg. control	NA	NA	ABI7500-FastDx	TaqMan	strip tube	31.461	26.2101	24.2946	25.0075	4.538	4.538	2.53046	0.13	2.2	7.42	96	68	71	65	108	5.7	6	112	1	0	0	37	37.8	37.9	36.5	36.5	8.1	10.5	10.5	14.1
138	3	0	0.21	1	female	white	A4	W3	O	3	yes	NA	NA	Infection neg. control	-0.71	Early Prophylactics	ABI7500-FastDx	TaqMan	strip tube	30.6447	23.4545	24.6696	23.7101	8.1497	8.1497	6.13855	0.42	3.9	7.32	98	67	101	67	118	3.7	6	149	0	1	0	37.6	37.8	37.8	35.5	35.5	7.6	7.8	7.8	7.5
139	3	0	0.15	1	female	white	A1	W3	O	3	yes	NA	NA	Infection neg. control	0.6	Early Prophylactics	ABI7500-FastDx	TaqMan	strip tube	29.8573	24.9612	25.1157	24.348	5.6638	5.6638	3.65514	0.05	NA	7.42	95	64	68	60	122	7.5	10	116	0	0	0	37.4	37.7	38.5	35.5	35.5	3.9	7.6	7.6	6.1
140	3	0	0.053	1	male	white	A4	W4	O	2	no	NA	NA	Infection neg. control	NA	NA	ABI7500-FastDx	TaqMan	strip tube	29.3337	26.1691	24.6152	24.6065	3.1733	3.1733	1.16713	0.3	4	7.39	84	60	84	60	103	6.3	5	105	0	0	0	37.7	38	38	36.3	36.3	9.1	13.2	13.2	8.5
141	3	0	0.22	1	female	white	A4	W3	Ob1	4	yes	NA	NA	Infection neg. control	-0.7	Early Prophylactics	ABI7500-FastDx	TaqMan	strip tube	28.7854	25.1862	23.7577	23.4153	3.9416	3.9416	1.93466	NA	3.4	7.4	NA	44	62	44	146	7.9	4	181	0	0	0	NA	35.8	35.8	33.4	33.4	21.4	21.9	21.9	8.8
142	3	0	0.026	1	male	white	A5	W2	N	2	yes	NA	NA	Infection neg. control	-0.092	Early Prophylactics	ABI7500-FastDx	TaqMan	strip tube	29.7006	24.2171	22.9957	24.3312	4.148	4.148	2.14085	0.14	3.7	7.33	98	68	75	68	109	6.7	5	122	0	0	0	36.8	37	37.1	36.6	36.6	16.9	19.8	20.7	10.8
143	3	0	0.19	1	female	white	A3	W3	O	2	no	NA	NA	Infection neg. control	NA	NA	ABI7500-FastDx	TaqMan	strip tube	30.7968	26.0997	22.7714	23.2724	4.1961	4.1961	2.1889	NA	3.1	7.44	NA	79	87	79	147	NA	3	119	0	0	0	NA	38	38	36.1	36.1	NA	NA	10.4	7.3
144	3	0	0.012	1	male	white	A6	W5	Ob3	4	yes	NA	NA	Infection neg. control	-0.73	Early Prophylactics	ABI7500-FastDx	TaqMan	strip tube	28.3689	24.7702	22.6246	23.7766	2.4467	2.4467	0.441253	0.32	3	NA	92	83	92	82	170	7.9	5	109	0	0	0	36.1	36.9	36.9	35	35	29	29	29	9.4
145	3	0	0.0028	1	female	white	A5	W3	O	3	no	NA	NA	Infection neg. control	NA	NA	ABI7500-FastDx	TaqMan	strip tube	28.4081	25.34	24.5147	23.972	3.6108	3.6108	1.60419	3.57	3	7.29	66	56	66	56	98	8.1	4	93	0	0	0	37.1	38	38	36	36.1	15	26.2	26.2	10.8
146	3	0	0.031	1	male	white	A4	W3	N	2	no	NA	NA	Infection neg. control	NA	NA	ABI7500-FastDx	TaqMan	strip tube	28.1909	25.6285	23.3328	23.8671	2.0281	2.0281	0.0230719	NA	2.6	7.34	79	67	84	67	101	8.4	3	158	0	0	0	36.3	36.5	36.5	34.5	36.2	12.8	13.5	13.5	7.6
147	3	0	0.26	1	female	NA	A5	W2	O	3	yes	NA	NA	Infection neg. control	-0.012	NA	ABI7500-FastDx	TaqMan	strip tube	31.4262	26.3837	23.682	24.9582	3.7663	3.7663	1.75953	10.48	NA	7.44	59	47	90	47	121	5	8	123	0	0	0	35.5	36.6	36.6	31.6	31.6	8	8	14	10.8
148	3	0	0.052	1	female	white	A3	W3	O	2	no	NA	NA	Infection neg. control	NA	NA	ABI7500-FastDx	TaqMan	strip tube	28.1152	24.6972	24.2236	24.0453	3.5963	3.5963	1.5897	0.05	NA	7.39	96	88	117	88	121	6.5	1	128	0	0	0	37.4	37.6	37.6	36.4	36.4	10.4	12	12	6.7
149	3	0	0.06	1	male	white	A6	W2	N	3	yes	NA	NA	Infection neg. control	-0.69	Early Prophylactics	ABI7500-FastDx	TaqMan	strip tube	28.9059	25.9606	23.0949	23.7241	2.3161	2.3161	0.310784	0.48	1.2	7.33	89	61	89	61	122	5	4	123	0	0	1	37.2	37.6	37.6	34.6	34.6	6.2	9	9	6.6
150	3	0	0.012	1	female	white	A4	W3	O	4	yes	NA	NA	Infection neg. control	-0.18	Early Prophylactics	ABI7500-FastDx	TaqMan	strip tube	30.3171	25.6679	23.779	24.2177	4.2105	4.2105	2.20329	0.39	NA	7.39	90	80	98	80	112	4.9	15	112	0	0	1	37.2	38.3	38.3	33.1	34	18.1	18.1	28	13.7
151	3	0	0.022	1	female	white	A5	W3	O	3	yes	NA	NA	Infection neg. control	-0.62	Early Prophylactics	ABI7500-FastDx	TaqMan	strip tube	29.6997	25.1839	22.7812	23.9965	3.3005	3.3005	1.2942	0.05	3.8	7.32	80	74	80	74	123	8.3	13	83	0	0	0	37	37.8	37.8	36.3	36.4	24	29.2	29.2	8.9
152	3	0	0.027	1	female	white	A1	W2	N	2	no	NA	NA	Infection neg. control	NA	NA	ABI7500-FastDx	TaqMan	strip tube	28.7641	26.0071	22.9717	23.4217	2.307	2.307	0.301693	0.08	NA	7.4	64	55	67	55	126	6.4	4	99	0	0	0	36.4	36.8	36.8	35.4	36.1	12.1	15.5	15.5	6.1
153	3	0	0.058	1	female	white	A4	W3	O	3	yes	NA	NA	Infection neg. control	-0.65	Early Prophylactics	ABI7500-FastDx	TaqMan	strip tube	30.4853	25.2643	23.1812	23.7049	4.6973	4.6973	2.6896	0.15	1.3	7.39	54	48	55	48	109	5.6	9	162	0	0	0	36.1	37.5	37.5	33.3	36.1	14	14.3	15.1	9.2
154	3	0	0.12	1	female	white	A6	W3	O	3	yes	NA	NA	Infection neg. control	0.019	Early Prophylactics	ABI7500-FastDx	TaqMan	strip tube	29.6371	25.22	24.4083	23.6708	5.1546	5.1546	3.14645	0.02	NA	7.44	60	49	53	49	71	7.5	5	155	0	0	0	36.7	37	37	34.5	34.5	13.7	14.1	14.1	10.1
155	3	0	0.081	1	male	white	A4	W3	N	3	no	NA	NA	Infection neg. control	NA	NA	ABI7500-FastDx	TaqMan	strip tube	27.6886	23.5293	23.3052	22.826	4.6385	4.6385	2.63086	0.62	NA	7.32	91	82	85	82	112	7.9	2	122	0	0	0	37.3	38.1	38	37	37	15.6	20	20	7.4
156	3	0	0.078	1	female	white	A3	W3	O	4	no	NA	NA	Infection neg. control	NA	NA	ABI7500-FastDx	TaqMan	strip tube	30.3337	24.1313	27.1799	24.4073	8.975	8.975	6.96303	0.06	NA	7.4	79	77	84	77	134	7.1	2	111	0	0	0	36	37	37	34.6	34.6	3.1	3.4	3.4	6.8
157	3	0	0.06	1	male	black	A1	W2	N	2	no	NA	NA	Infection neg. control	NA	NA	ABI7500-FastDx	TaqMan	strip tube	29.4154	25.6989	24.0559	23.884	3.8884	3.8884	1.88151	0.13	17.4	7.47	70	62	91	62	108	7.8	2	128	0	0	0	37	37	37	33.9	33.9	10.6	11.7	11.7	7.3
158	3	0	0.04	1	female	white	A1	W3	O	4	no	NA	NA	Infection neg. control	NA	NA	ABI7500-FastDx	TaqMan	strip tube	29.9086	24.5429	24.2853	24.076	5.575	5.575	3.56642	0.04	NA	7.5	65	61	66	61	114	7.1	0	151	0	0	0	38.3	38.7	38.7	38	38	12.1	12.1	12.1	6.6
159	3	0	0.051	1	female	white	A5	W4	Ob2	3	yes	NA	NA	Infection neg. control	-0.14	Early Prophylactics	ABI7500-FastDx	TaqMan	strip tube	30.2787	24.814	23.7566	23.9858	5.2355	5.2355	3.22726	0.12	1.8	7.45	73	58	71	60	100	7.3	5	134	0	0	0	36.9	37.2	37.6	34.6	35.3	27.5	28.4	27.5	9.7
160	3	0	0.016	1	female	white	A3	W2	N	3	yes	NA	NA	Infection neg. control	-0.12	Early Prophylactics	ABI7500-FastDx	TaqMan	strip tube	27.3165	25.1009	23.0813	22.8777	2.4192	2.4192	0.413781	0.1	5.7	7.31	113	67	90	67	128	8.2	4	115	0	0	0	37.8	37.5	37.9	32.9	33.9	14.2	21.3	20.1	10.9
161	3	0	0.056	1	male	white	A5	W2	N	2	yes	NA	NA	Infection neg. control	-1.5	Early Prophylactics	ABI7500-FastDx	TaqMan	strip tube	31.2729	22.512	24.6106	24.0294	9.3421	9.3421	7.32976	2.14	2.1	7.39	68	56	96	55	117	4.6	15	91	0	0	0	37.2	38.3	38.3	36.7	36.7	7.5	8.5	8.5	10.4
162	3	0	0.028	1	female	white	A5	W2	N	4	yes	NA	NA	Infection neg. control	0.32	Early Prophylactics	ABI7500-FastDx	TaqMan	strip tube	27.0257	24.9471	22.4876	23.0816	1.4846	1.4846	-0.519885	NA	7.9	7.16	101	99	131	99	135	8.4	12	120	0	0	0	36.4	36.4	36.4	35.8	35.8	20.7	35.3	35.3	14.3
163	3	0	0.13	1	female	white	A4	W4	O	4	yes	NA	NA	Infection neg. control	-0.27	Early Prophylactics	ABI7500-FastDx	TaqMan	strip tube	30.7033	24.8822	22.4204	22.7413	5.5002	5.5002	3.4917	0.02	1.3	7.36	72	69	76	68	114	7	2	129	0	0	0	36.4	37.4	37.3	35.4	35.6	7.5	15.5	16.9	10.2
164	3	0	0.026	1	male	white	A2	W3	N	3	no	NA	NA	Infection neg. control	NA	NA	ABI7500-FastDx	TaqMan	strip tube	30.6133	26.0187	23.046	23.938	3.7026	3.7026	1.6959	0.04	NA	7.4	54	47	67	47	89	8.1	3	106	0	0	0	36.5	36.9	36.9	34.2	35.5	14.3	24	20.8	8.8
165	3	0	0.1	1	male	white	A3	W4	O	3	yes	NA	NA	Infection neg. control	-0.7	Early Prophylactics	ABI7500-FastDx	TaqMan	strip tube	28.6263	24.8607	22.7597	23.8778	2.6475	2.6475	0.641852	3.81	9.5	7.38	71	69	80	69	90	6.3	17	93	1	1	0	38	38.6	38.6	36.4	36.4	21	24.1	24.1	19.2
166	3	0	0.015	1	female	white	A3	W2	N	3	yes	NA	NA	Infection neg. control	-0.62	Early Prophylactics	ABI7500-FastDx	TaqMan	strip tube	30.4467	25.8167	24.2745	24.8347	4.0698	4.0698	2.06273	8.35	6.7	7.37	129	118	141	120	149	4.4	16	91	0	0	1	37.2	37.8	37.8	36.6	36	12.6	14.8	14.8	9.8
167	3	0	0.034	1	female	white	A8	W2	N	3	yes	NA	NA	Infection neg. control	0.052	Early Prophylactics	ABI7500-FastDx	TaqMan	strip tube	29.5937	24.4169	23.3869	23.4938	5.0699	5.0699	3.06183	189	3.4	7.29	95	65	129	65	161	6.4	12	140	0	0	0	33.4	34.4	34.4	32.6	32.6	2.4	21.2	21.2	14.4
168	3	0	0.19	1	female	white	A4	W3	O	3	yes	NA	NA	Infection neg. control	-0.6	Early Prophylactics	ABI7500-FastDx	TaqMan	strip tube	33.0358	27.508	22.2603	24.9077	2.8804	2.8804	0.87452	0.07	NA	7.4	61	45	50	44	72	4.8	2	129	0	0	0	36	36.8	36.8	35.2	35.3	13.2	13.2	13.2	12.6
169	3	0	0.21	1	female	white	A4	W3	O	3	no	NA	NA	Infection neg. control	NA	NA	ABI7500-FastDx	TaqMan	strip tube	28.8465	24.9931	22.8697	22.8783	3.8448	3.8448	1.83796	0.14	NA	7.62	49	41	79	41	105	8.5	0	127	0	0	0	37.3	38.1	38.1	34.5	34.8	11.2	14.7	14	9.9
170	3	0	0.07	1	female	white	A5	W3	Ob1	2	no	NA	NA	Infection neg. control	NA	NA	ABI7500-FastDx	TaqMan	strip tube	29.1235	25.3134	24.77	24.6181	3.962	3.962	1.95504	0.03	1.2	7.26	70	57	69	57	85	5.9	3	103	0	0	0	NA	37.3	37.3	35.7	35.7	9.5	12.7	12.7	8.3
171	3	0	0.061	1	male	white	A1	W2	U	4	yes	NA	NA	Infection neg. control	-0.36	Early Prophylactics	ABI7500-FastDx	TaqMan	strip tube	28.3006	25.4519	22.7733	24.4411	1.1809	1.1809	-0.823281	0.79	4.3	7.4	84	80	130	83	140	5.4	6	94	0	0	0	37.1	38.3	38.7	36	36	14.8	14.8	14.8	12.9
172	3	0	0.022	1	female	white	A5	W3	Ob1	4	yes	NA	NA	Infection neg. control	-0.086	Early Prophylactics	ABI7500-FastDx	TaqMan	strip tube	29.5488	24.9357	24.4889	23.8165	5.2855	5.2855	3.27721	0.74	2.4	7.56	114	84	99	84	151	5.9	16	128	0	0	0	32.8	35.4	35.4	32.8	32.8	11	13.9	17.6	9.4
173	3	0	-0.17	2	female	white	A7	W2	O	2	no	NA	NA	Infection neg. control	NA	NA	ABI7500-FastDx	TaqMan	strip tube	31.5578	23.7262	24.129	23.9762	7.9844	7.9844	5.97342	3.25	2.8	7.45	86	83	104	82	104	6.9	NA	85	1	1	0	NA	36.2	NA	35.8	NA	11.7	11.7	11.7	10.9
174	3	0	0.23	2	male	white	A4	W5	Ob1	2	no	NA	NA	Infection neg. control	NA	NA	ABI7500-FastDx	TaqMan	strip tube	29.3643	25.7129	22.7699	24.1779	2.2434	2.2434	0.238157	0.1	1.5	NA	61	59	86	58	105	5.7	NA	105	0	0	0	36.6	NA	NA	NA	NA	12.5	12.5	12.5	11.1
175	3	0	0.14	2	female	white	A4	W2	N	3	yes	NA	NA	Infection neg. control	0.39	Early Prophylactics	ABI7500-FastDx	TaqMan	strip tube	30.1631	25.9328	24.1454	24.259	4.1167	4.1167	2.10958	0.04	NA	7.39	77	71	107	61	121	7.7	9	113	0	0	0	37	38	37	37.3	35.5	16.6	19.6	19.6	8.7
176	3	0	0.16	2	male	white	A2	W3	O	2	no	NA	NA	Infection neg. control	NA	NA	ABI7500-FastDx	TaqMan	strip tube	28.9188	24.8172	24.6384	24.5058	4.2342	4.2342	2.22697	NA	1.8	7.3	81	71	86	70	111	8.2	NA	94	0	0	0	33.6	37.8	37.3	34.5	33.4	4.8	4.8	4.8	5.2
177	3	0	0.16	2	male	white	A5	W3	Ob1	3	yes	NA	NA	Infection neg. control	-0.88	Early Prophylactics	ABI7500-FastDx	TaqMan	strip tube	30.375	25.2252	23.8481	24.7132	4.2847	4.2847	2.27742	15.85	10.2	7.26	66	58	97	57	110	NA	NA	117	0	0	0	33.3	NA	33.3	NA	NA	11.6	16.1	16.1	13.6
178	3	0	0.18	2	female	white	A6	W3	Ob2	3	yes	NA	NA	Infection neg. control	-0.82	Early Prophylactics	ABI7500-FastDx	TaqMan	strip tube	29.4347	24.9266	25.1245	25.047	4.5856	4.5856	2.57801	0.33	8	NA	72	69	113	68	113	4.6	NA	112	0	1	0	37.5	38.7	37.7	36.2	33.4	2.7	5.3	5.3	12.2
179	3	0	0.58	2	male	white	A3	W3	O	2	yes	NA	NA	Infection neg. control	0.21	Early Prophylactics	ABI7500-FastDx	TaqMan	strip tube	28.048	22.9574	23.2695	23.1225	5.2376	5.2376	3.22936	12.43	8.6	7.23	50	48	93	47	93	7.8	16	101	0	0	1	NA	35	NA	32.6	NA	13.4	15.9	15.9	18.3
180	3	0	0.47	2	male	white	A6	W4	O	2	yes	NA	NA	Infection neg. control	0.0083	Early Prophylactics	ABI7500-FastDx	TaqMan	strip tube	30.8592	25.5631	23.1509	24.6513	3.7957	3.7957	1.7889	1.62	4.1	7.39	94	88	97	86	122	5.6	NA	97	0	1	0	36.8	36.8	36.8	35.8	35.4	8.2	9.1	9.1	10.7
181	3	0	0.56	2	female	NA	A1	W3	Ob2	4	yes	NA	NA	Infection neg. control	0.14	Early Prophylactics	ABI7500-FastDx	TaqMan	strip tube	32.1366	24.7593	24.3731	24.4811	7.2693	7.2693	5.25903	4.41	10.5	7.24	142	131	147	130	163	4.4	NA	76	0	0	1	37.7	38.3	38.4	36.2	36.1	21.9	29.3	29.3	12.2
182	3	0	0.15	2	male	white	A3	W3	N	3	yes	NA	NA	Infection neg. control	-0.41	Early Prophylactics	ABI7500-FastDx	TaqMan	strip tube	29.2273	24.1759	24.7823	24.0027	5.831	5.831	3.82217	0.06	4.6	7.35	105	70	77	70	120	NA	1	102	0	0	0	37.3	39.6	38.6	35.5	34.5	5.2	5.7	5.7	7.3
183	3	0	0.26	2	male	white	A7	W3	O	2	no	NA	NA	Infection neg. control	NA	NA	ABI7500-FastDx	TaqMan	strip tube	29.3133	23.6331	23.6168	23.5357	5.7613	5.7613	3.75254	NA	1	NA	107	96	102	93	153	4.6	NA	101	1	0	0	37.7	NA	NA	NA	NA	18	18	18	13
184	3	0	0.29	2	male	white	A1	W3	O	3	yes	NA	NA	Infection neg. control	-0.081	Early Prophylactics	ABI7500-FastDx	TaqMan	strip tube	28.5703	23.4278	24.2764	24.2119	5.207	5.207	3.19879	5	3	7.33	106	76	98	72	145	5.1	5	93	0	0	0	38.2	39.2	38.3	36.9	35.9	12	13.2	13.2	7.6
185	3	0	0.75	2	female	white	A3	W2	N	2	no	NA	NA	Infection neg. control	NA	NA	ABI7500-FastDx	TaqMan	strip tube	30.2415	25.7207	26.4237	25.4029	5.5416	5.5416	3.53306	0.03	0.8	7.49	97	86	104	87	111	5.3	4	111	0	0	0	NA	NA	NA	NA	NA	6.5	8.4	8.4	6.1
186	3	0	0.29	2	female	white	A3	W2	N	3	yes	NA	NA	Infection neg. control	-0.51	Early Prophylactics	ABI7500-FastDx	TaqMan	strip tube	28.2883	25.7014	23.9048	24.4415	2.0502	2.0502	0.0451498	0.13	2.1	7.19	80	52	79	51	140	6.5	7	87	0	0	0	34.7	35.5	37.8	32.1	32.1	12.7	18.2	18.2	8.1
187	3	0	0.4	2	male	white	A6	W3	N	2	yes	NA	NA	Infection neg. control	1.2	NA	ABI7500-FastDx	TaqMan	strip tube	31.0333	26.0213	24.6295	24.6821	4.9594	4.9594	2.95144	0.59	1.2	NA	91	80	97	77	116	5.7	3	160	0	0	0	36.3	NA	NA	NA	NA	12	12	16.4	10.8
188	3	0	0.28	2	male	white	A5	W4	O	2	yes	NA	NA	Infection neg. control	-0.51	Early Prophylactics	ABI7500-FastDx	TaqMan	strip tube	30.0846	25.876	22.3773	23.3735	3.2124	3.2124	1.20619	0.08	1.1	NA	82	58	72	52	94	8.5	3	123	0	0	0	38	39.1	38.2	38.2	35.9	14.2	14.5	14.5	9.7
189	3	0	-0.2	2	male	white	A5	W3	O	4	yes	NA	NA	Infection neg. control	-0.2	NA	ABI7500-FastDx	TaqMan	strip tube	30.6438	25.9477	25.4769	24.8764	5.2966	5.2966	3.2883	0.43	5.7	NA	110	105	132	100	132	5.5	6	113	0	0	0	37.9	39	38.8	36.7	34	14.8	14.8	16.1	7.9
190	3	0	0.76	2	male	white	A1	W2	N	3	yes	NA	NA	Infection neg. control	-0.029	Early Prophylactics	ABI7500-FastDx	TaqMan	strip tube	28.6457	23.4748	23.7555	22.9829	5.9435	5.9435	3.93456	1.43	11.3	NA	144	76	97	71	150	9.3	11	125	0	0	0	39.8	37.9	40.1	36.7	37.1	31.1	31.1	31.1	15
191	3	0	0.93	2	female	white	A7	W2	N	2	yes	NA	NA	Infection neg. control	0.18	Early Prophylactics	ABI7500-FastDx	TaqMan	strip tube	30.9978	22.746	23.2591	22.8196	8.6913	8.6913	6.67961	2.78	2.5	7.34	87	87	87	82	88	7.9	NA	90	0	0	0	36.4	36.4	36.4	35	35	8.6	13.8	13.8	14.2
192	3	0	0.57	2	female	white	A4	W2	N	2	no	NA	NA	Infection neg. control	NA	NA	ABI7500-FastDx	TaqMan	strip tube	32.5038	25.6468	23.4454	23.8427	6.4597	6.4597	4.45024	0.13	1.6	7.29	74	67	129	64	129	7.5	4	97	0	0	0	36.5	38.1	37.1	36.8	34.8	15	15.9	15.9	8.7
193	3	0	0.15	2	female	black	A4	W2	N	3	yes	NA	NA	Infection neg. control	-0.73	Early Prophylactics	ABI7500-FastDx	TaqMan	strip tube	32.0577	27.0157	23.4865	25.2291	3.2994	3.2994	1.2931	0.14	2.7	7.46	81	64	97	70	97	6.8	7	83	0	1	0	36.1	36.8	36.8	34.9	34.9	8.4	10.8	10.8	15.9
194	3	0	0.16	2	male	asian	A1	W3	N	3	yes	NA	NA	Infection neg. control	-0.84	Early Prophylactics	ABI7500-FastDx	TaqMan	strip tube	29.5286	24.1981	23.798	23.3459	5.7826	5.7826	3.77382	0.56	2.1	7.34	100	73	87	70	131	8.5	6	113	0	0	0	37.5	37.8	37.9	26	34.1	22.4	25.9	25.9	7.4
195	3	1	0.94	2	male	white	A6	W2	N	4	yes	NA	NA	Infection neg. control	-0.44	Early Prophylactics	ABI7500-FastDx	TaqMan	strip tube	31.3502	24.8443	24.9146	25.5774	5.8431	5.8431	3.83426	0.69	1.7	NA	76	65	110	64	162	5.9	9	119	0	0	0	36.4	37.6	36.7	36.7	35.7	16.4	16.4	16.4	12.6
196	3	0	0.14	2	male	white	A5	W4	Ob1	2	yes	NA	NA	Infection neg. control	-0.86	Early Prophylactics	ABI7500-FastDx	TaqMan	strip tube	28.2499	24.3856	23.1862	23.11	3.9405	3.9405	1.93356	10.63	9.2	7.26	69	57	150	54	150	8.4	6	99	0	0	0	NA	34.6	NA	32.3	NA	15.1	15.9	15.9	14.5
197	3	0	-300	2	male	white	A3	W3	N	4	yes	NA	NA	Infection neg. control	-0.52	Early Prophylactics	ABI7500-FastDx	TaqMan	strip tube	29.758	24.8295	23.611	24.2221	4.3174	4.3174	2.31008	7.97	1.2	NA	63	48	71	NA	100	5.5	10	120	0	0	1	36.1	37.2	37.6	35.7	35.5	5.3	6.8	13	7.5
198	3	1	0.049	2	male	white	A4	W3	N	2	yes	NA	NA	Infection neg. control	1.4	Early Prophylactics	ABI7500-FastDx	TaqMan	strip tube	32.841	25.8501	24.0946	23.9433	7.1422	7.1422	5.13206	0.31	1.2	7.42	79	67	70	69	87	5.8	7	92	0	0	0	36.8	37.3	37.2	35.8	35.7	13.3	13.3	13.3	10.7
199	3	0	0.98	2	male	white	A1	W1	U	3	no	NA	NA	Infection neg. control	NA	NA	ABI7500-FastDx	TaqMan	strip tube	32.4911	25.9249	21.1254	23.4104	4.2812	4.2812	2.27392	0.06	1.9	7.44	94	63	93	58	144	4.8	2	104	0	0	0	36.8	37.4	37.5	34.6	34.6	10.1	17	17	6
200	3	0	0.24	2	female	white	A6	W2	N	4	yes	NA	NA	Infection neg. control	0.86	Early Prophylactics	ABI7500-FastDx	TaqMan	strip tube	30.7232	27.1806	23.866	23.962	3.4466	3.4466	1.44015	0.03	1.3	7.38	124	64	91	66	155	7.4	5	157	0	0	0	35.8	35.8	36.5	35.8	35.1	17.4	17.4	21.5	9.1
201	3	1	0.64	2	male	white	A5	W3	O	3	yes	-0.9	none	Infection neg. control*	-0.85	NA	ABI7500-FastDx	TaqMan	strip tube	33.0427	26.0929	26.1117	24.9381	8.1234	8.1234	6.11228	1.03	1.7	7.28	124	102	152	88	152	4.8	NA	105	0	1	0	35.8	35.2	36.4	35.1	34.9	7.6	8.3	8.3	10.5
202	4	0	0.72	2	female	white	A6	W1	U	2	NA	-1.5	possible	Indeterminate	-0.49	NA	ABI7500-FastDx	Asuragen	strip tube	25.3818	21.1867	22.246	23.1063	3.3348	5.34514	3.3348	0.08	2.4	NA	92	55	109	53	130	7.4	4	128	1	1	0	37.2	37	NA	36	NA	11.4	14.9	14.9	13.2
203	4	0	0.87	2	female	white	A5	W5	Ob3	2	yes	-0.8	possible	Indeterminate	-0.81	NA	ABI7500-FastDx	Asuragen	strip tube	28.9098	21.5362	22.8789	24.0553	6.1972	8.21126	6.1972	6.99	1.5	7.51	91	77	114	77	114	5.4	NA	92	1	1	0	36.5	39	NA	37	NA	19.3	21	21	16.7
204	4	0	0.13	2	male	white	A6	W3	O	3	NA	-0.6	possible	Indeterminate	-0.62	NA	ABI7500-FastDx	Asuragen	strip tube	30.0103	21.4719	24.2566	23.9303	8.8647	10.8822	8.8647	45.11	3.9	7.24	85	46	109	46	130	8	8	97	0	1	0	33.5	33.6	37.3	31.4	NA	2	2	2	10.4
205	4	0	0.64	2	male	white	A7	W3	O	2	NA	0.3	possible	Indeterminate	0.27	NA	ABI7500-FastDx	Asuragen	strip tube	26.036	20.4506	22.2245	24.0411	3.7688	5.7797	3.7688	0.11	NA	7.36	92	56	84	52	108	7.3	6	108	0	0	0	38.5	38.4	NA	35.7	NA	6.3	7.2	7.2	8.7
206	4	0	-0.089	2	female	white	A5	W2	O	2	NA	-0.1	possible	Indeterminate	-0.089	NA	ABI7500-FastDx	Asuragen	strip tube	27.3978	19.6977	19.9946	21.582	6.1127	8.12665	6.1127	2.6	0.9	NA	83	38	74	NA	88	4.2	3	76	0	0	0	36.3	37.3	36.3	35.5	34.5	19.1	19.1	22.5	6.3
207	4	0	0.32	2	female	white	A6	W2	N	2	NA	-1.6	possible	Indeterminate	-0.6	NA	ABI7500-FastDx	Asuragen	strip tube	26.8238	22.0273	21.6899	23.2234	3.263	5.27324	3.263	0.19	NA	7.31	74	70	110	70	110	5.2	6	97	0	0	0	NA	NA	NA	NA	NA	10.8	14.7	14.7	10.3
208	4	0	-0.45	2	female	white	A2	W3	O	2	NA	-0.5	possible	Indeterminate	-0.45	NA	ABI7500-FastDx	Asuragen	strip tube	28.9706	21.6246	20.3057	24.036	3.6157	5.6264	3.6157	0.02	7.4	NA	86	70	137	74	144	6.3	5	120	0	0	0	NA	36.5	NA	35.6	NA	10.9	21.1	21.1	10.6
209	4	0	0.5	2	female	white	A5	W2	N	4	yes	0.1	possible	Indeterminate	-0.92	NA	ABI7500-FastDx	Asuragen	strip tube	24.5535	20.1258	21.5917	22.3902	3.6292	5.63992	3.6292	6.23	3.3	7.18	77	72	149	70	149	5.5	7	107	0	1	0	35.9	36.5	36.6	35.3	34.7	18.9	20.4	20.4	10
210	4	0	0.91	2	male	white	A3	W4	Ob2	4	NA	-0.7	possible	Indeterminate	-0.7	NA	ABI7500-FastDx	Asuragen	strip tube	26.107	20.1355	22.0262	23.6492	4.3485	6.36015	4.3485	3.08	7.1	7.32	99	88	91	87	114	6.6	9	103	1	0	0	35.7	37.3	36.4	36.3	33.6	19.2	19.7	19.7	18.5
211	4	0	0.1	2	male	white	A3	W6	Ob3	2	NA	-0.9	possible	Indeterminate	-0.9	Early Prophylactics	ABI7500-FastDx	Asuragen	strip tube	26.1569	21.3818	21.2408	22.9938	3.0221	5.03203	3.0221	0.15	3	7.42	78	65	94	63	96	7.7	3	151	0	0	0	36.7	37.4	NA	37.4	NA	12.3	16.8	16.8	17.2
212	4	0	0.44	2	female	white	A7	W2	N	2	NA	-0.9	possible	Indeterminate	-0.94	NA	ABI7500-FastDx	Asuragen	strip tube	27.232	20.0001	20.6174	23.0493	4.8	6.81224	4.8	2.16	2.7	7.39	52	44	91	40	91	7	7	77	0	0	0	NA	NA	NA	NA	NA	25	32	32	9.8
213	4	0	0.41	2	male	white	A1	W4	O	4	NA	0.7	possible	Indeterminate	-0.34	Early Prophylactics	ABI7500-FastDx	Asuragen	strip tube	24.2287	18.8896	22.6249	22.6548	5.3092	7.3221	5.3092	1.59	4.3	7.16	119	95	113	84	155	7.5	11	87	0	0	0	37.7	39.1	39.2	36.1	35.2	8.6	13.1	13.1	10.2
214	4	0	0.16	2	female	white	A6	W3	O	2	yes	-0.6	possible	Indeterminate	-0.61	NA	ABI7500-FastDx	Asuragen	strip tube	29.5279	23.4704	22.3742	25.2164	3.2153	5.22548	3.2153	0.41	1.8	7.38	87	53	87	51	105	4.4	9	90	0	0	1	36.8	36.8	36.8	33.8	33.4	3.8	6.8	6.8	9.4
215	4	0	0.46	2	male	white	A5	W2	N	4	NA	-0.8	possible	Indeterminate	-0.75	NA	ABI7500-FastDx	Asuragen	strip tube	25.5173	21.0738	20.5049	22.8974	2.051	4.05967	2.051	0.41	6.9	7.24	114	101	143	100	143	8.1	6	142	1	1	0	37	37.1	37.1	35.1	34.8	18.7	20.2	20.2	15.5
216	4	0	0.3	2	male	white	A3	W4	Ob1	3	NA	-0.6	possible	Indeterminate	-0.64	NA	ABI7500-FastDx	Asuragen	strip tube	25.5971	20.1092	21.317	22.0733	4.7316	6.74375	4.7316	0.69	4.9	NA	74	59	89	51	92	6.5	NA	87	0	0	0	34.9	35.3	35.4	34.5	33.7	14.1	14.1	14.1	8.7
217	4	0	0.033	2	male	white	A3	W4	Ob1	3	NA	-1	possible	Indeterminate	-0.97	NA	ABI7500-FastDx	Asuragen	strip tube	28.8239	18.5514	21.9824	24.7115	7.5434	9.55921	7.5434	29.56	11.4	7.28	79	45	111	44	114	7.4	12	120	0	0	0	33.8	35.7	34.8	33.5	32.5	16.3	27.8	27.8	10.8
218	4	0	0.27	2	female	white	A5	W3	O	2	NA	-0.1	possible	Indeterminate	-0.14	NA	ABI7500-FastDx	Asuragen	strip tube	25.023	19.0828	23.0928	23.2476	5.7854	7.79892	5.7854	1.2	1.2	NA	81	68	111	68	111	6.7	3	88	0	0	0	35.4	40	39	37.2	33	8.4	8.4	8.4	8.3
219	4	0	-0.071	2	female	white	A1	W2	N	3	NA	-0.1	possible	Indeterminate	-0.071	NA	ABI7500-FastDx	Asuragen	strip tube	29.4457	18.057	20.2119	22.5353	9.0653	11.0831	9.0653	59.71	11.1	7.18	85	79	135	84	151	3.9	NA	93	0	0	0	NA	37	NA	36	NA	49.7	49.7	49.7	12.2
220	4	0	0.15	2	male	white	A6	W3	Ob1	4	NA	-0.3	possible	Indeterminate	-0.27	NA	ABI7500-FastDx	Asuragen	strip tube	26.183	19.1976	21.7028	22.8445	5.8437	7.8573	5.8437	NA	1.6	NA	NA	80	99	80	103	7.5	NA	141	1	0	0	38.2	38	NA	38	NA	13.7	13.7	13.7	12.8
221	4	0	0.11	2	male	white	A7	W2	N	2	NA	1.1	possible	Indeterminate	1.1	NA	ABI7500-FastDx	Asuragen	strip tube	22.9984	20.4156	21.0072	22.6075	0.9825	2.98978	0.9825	0.64	1.3	7.29	40	36	56	35	62	5.5	6	93	1	0	0	NA	NA	NA	NA	NA	15.2	18.6	18.6	9.6
222	4	0	0.15	2	female	white	A6	W5	Ob3	4	NA	-2.6	culture proven	Sepsis	-0.6	NA	ABI7500-FastDx	Asuragen	strip tube	25.142	19.4681	21.1366	22.3591	4.4514	6.46319	4.4514	0.37	1.9	7.22	103	89	115	89	143	6.8	9	82	1	0	0	37.9	39.2	38.2	34.9	34.3	15.7	20.1	20.1	12.4
223	4	0	0.17	2	female	white	A5	W2	N	3	yes	-0.7	probable	Sepsis	-0.75	NA	ABI7500-FastDx	Asuragen	strip tube	24.3046	19.193	20.9314	21.7827	4.2603	6.27184	4.2603	19.72	1.3	7.36	83	71	144	70	144	7.6	11	84	0	1	0	37.7	39	39	34.7	34.7	20.4	26.6	26.6	7.5
224	4	0	0.64	2	male	white	A4	W4	O	2	NA	0.1	probable	Sepsis	0.059	NA	ABI7500-FastDx	Asuragen	strip tube	28.7174	19.5943	21.0783	22.2048	7.9966	10.013	7.9966	9.18	1.1	NA	61	49	100	48	100	7.6	3	98	1	1	0	35.7	38.4	37.4	36.7	34.6	12.1	13.3	13.3	15.8
225	4	0	0.23	2	male	white	A5	W3	O	2	NA	-0.7	culture proven	Sepsis	-0.69	NA	ABI7500-FastDx	Asuragen	strip tube	25.5195	17.5824	21.1527	21.5384	7.5514	9.56722	7.5514	8.82	1.6	NA	73	60	100	55	121	6.9	10	104	0	0	0	35.9	37.5	37.6	35.7	35.4	8.6	10.1	10.1	10.5
226	4	0	0.088	2	male	white	A5	W5	Ob2	2	NA	-0.6	probable	Sepsis	-0.58	NA	ABI7500-FastDx	Asuragen	strip tube	28.4173	17.6937	21.2206	22.9902	8.954	10.9716	8.954	27.3	3.1	7.4	86	75	99	74	103	4.5	8	102	1	1	0	36.4	37.9	38.6	37.9	35.7	22.4	22.4	22.4	31.8
227	4	0	0.38	2	male	white	A3	W5	Ob2	3	NA	-0.7	culture proven	Sepsis	-0.66	NA	ABI7500-FastDx	Asuragen	strip tube	26.134	17.4774	22.176	22.5746	8.258	10.2747	8.258	29.54	3	7.39	123	106	137	103	137	6.8	8	88	0	1	0	38.2	39.3	38.3	37.8	35.4	NA	NA	NA	11.3
228	4	0	0.47	2	male	white	A4	W3	O	2	NA	-2	culture proven	Sepsis	-0.95	NA	ABI7500-FastDx	Asuragen	strip tube	26.969	19.8208	21.327	22.6848	5.7904	7.80393	5.7904	6.41	0.8	7.31	102	94	107	93	123	4.9	8	107	1	1	1	37	38.9	37.9	37.7	36.7	11.4	11.4	11.4	9.5
229	4	0	0.58	2	male	white	A4	W4	Ob1	3	NA	0	culture proven	Sepsis	-0.049	NA	ABI7500-FastDx	Asuragen	strip tube	24.3641	18.0842	20.7462	21.3998	5.6263	7.63961	5.6263	6.2	1.6	7.21	102	85	112	67	138	4.5	7	83	0	0	0	36.9	39.2	38.2	36.5	35.5	NA	NA	18.3	10.1
230	4	0	0.59	2	male	white	A5	W2	N	3	NA	-0.8	culture proven	Sepsis	-0.83	Early Prophylactics	ABI7500-FastDx	Asuragen	strip tube	26.0771	17.617	22.0781	21.7728	8.7654	10.7828	8.7654	156.3	7.1	NA	122	89	113	85	141	5.8	12	97	0	0	1	NA	38.8	NA	37.9	NA	5.6	14.3	14.3	6.6
231	4	0	0.14	2	female	white	A6	W2	N	3	NA	-0.7	probable	Sepsis	-0.74	NA	ABI7500-FastDx	Asuragen	strip tube	26.0908	18.7686	22.9827	22.7982	7.5067	9.52246	7.5067	196.6	8.6	7.27	102	86	126	86	126	6	NA	88	0	0	1	36.7	39.5	39.2	34.2	34.4	5.2	15.9	15.9	9.1
232	4	0	0.099	2	male	white	A2	W3	O	2	NA	-0.5	culture proven	Sepsis	-0.48	NA	ABI7500-FastDx	Asuragen	strip tube	27.5248	21.3396	22.338	23.1556	5.3676	7.38058	5.3676	0.26	2.1	NA	112	85	142	72	142	8.1	6	167	0	0	0	32.5	38.7	37.8	36.8	36.7	9.9	13.6	13.6	8.7
233	4	0	0.98	2	female	white	A4	W4	Ob1	2	NA	1	probable	Sepsis	0.022	Early Prophylactics	ABI7500-FastDx	Asuragen	strip tube	28.6772	18.6584	23.1442	25.9102	7.2528	9.26823	7.2528	0.46	3.8	NA	128	120	141	NA	178	5.5	2	133	0	0	0	NA	NA	NA	NA	NA	8.9	11	11	11
234	4	0	-0.39	2	male	white	A4	W3	Ob1	2	NA	-0.4	culture proven	Sepsis	-0.41	NA	ABI7500-FastDx	Asuragen	strip tube	25.7075	18.7215	21.8897	23.1091	5.7666	7.7801	5.7666	16.32	1.5	NA	115	100	124	98	124	8.7	3	131	0	0	0	37	NA	NA	NA	NA	5.4	7.3	7.3	9.7
235	4	0	0.2	2	female	white	A1	W1	U	4	NA	-2.7	probable	Sepsis	-0.7	NA	ABI7500-FastDx	Asuragen	strip tube	26.829	20.0708	22.2915	22.6757	6.374	8.38829	6.374	4.49	0.7	7.29	135	128	182	127	182	6.7	4	104	0	0	0	37.3	38.7	38.9	36.7	36.7	26.7	26.7	26.7	13.3
236	4	0	0.4	2	female	white	A3	W3	O	3	NA	-0.1	culture proven	Sepsis	-0.06	NA	ABI7500-FastDx	Asuragen	strip tube	26.4663	18.0687	22.2821	23.7078	6.9719	8.98696	6.9719	8.48	8.9	7.35	110	102	115	100	128	5.9	11	92	0	0	0	37.1	38.2	37.7	36	35.8	14.5	14.5	22.9	9.3
237	4	0	0.36	2	male	white	A6	W3	N	3	NA	-1.4	probable	Sepsis	-0.39	NA	ABI7500-FastDx	Asuragen	strip tube	28.6688	20.8007	22.5668	22.9899	7.445	9.46068	7.445	0.25	1.4	7.3	92	73	107	69	127	6.2	9	96	1	1	0	37.4	37.6	37.6	36.9	35.6	20.5	24.8	24.8	15.4
238	4	0	0.073	2	male	white	A5	W3	N	2	NA	-0.5	culture proven	Sepsis	-0.47	NA	ABI7500-FastDx	Asuragen	strip tube	24.0113	19.2873	20.6122	22.1512	3.185	5.19514	3.185	2.44	1.5	7.43	62	49	59	46	92	8.9	3	148	0	0	0	36.9	37.2	NA	36.8	NA	24.1	24.2	24.2	15.3
239	4	0	0.36	2	male	white	A6	W2	N	2	NA	-1.4	culture proven	Sepsis	-0.43	NA	ABI7500-FastDx	Asuragen	strip tube	29.279	20.4391	22.0849	22.919	8.0058	10.0222	8.0058	2.96	1.1	7.21	59	56	74	55	146	7.5	9	82	0	1	0	36	36.2	NA	35.5	NA	32.9	35.1	35.1	13.8
240	4	0	0.42	2	female	white	A6	W3	O	3	yes	-0.2	none	Infection neg. control	-0.16	NA	ABI7500-FastDx	Asuragen	strip tube	25.8776	19.4266	21.3153	23.2753	4.491	6.50284	4.491	NA	1.9	NA	100	74	112	79	117	6	NA	96	0	0	0	37.4	37.7	37.7	37.3	36.5	22.9	22.9	22.9	6.9
241	4	0	0.47	2	female	white	A5	W5	Ob3	3	yes	NA	NA	Infection neg. control	0.12	Early Prophylactics	ABI7500-FastDx	Asuragen	strip tube	26.3939	21.1018	22.2783	23.515	4.0554	6.06667	4.0554	0.36	1.6	7.46	81	73	87	72	99	5.1	10	110	1	NA	0	36.1	37.3	36.5	36	35	9.7	19	19	19.3
242	4	0	0.67	2	male	white	A6	W2	N	2	yes	NA	NA	Infection neg. control	-0.75	Early Prophylactics	ABI7500-FastDx	Asuragen	strip tube	25.1829	17.5494	21.0714	22.473	6.2319	8.246	6.2319	4.7	1.7	7.39	107	92	102	90	142	7.2	5	76	0	0	0	37.4	38.6	37.6	35	34.1	8	10.5	10.5	7.6
243	4	0	0.13	2	female	white	A4	W1	U	2	yes	NA	NA	Infection neg. control	29	Early Prophylactics	ABI7500-FastDx	Asuragen	strip tube	25.0667	20.1257	21.0403	22.9387	3.0426	5.05256	3.0426	0.14	2.8	7.41	97	65	95	64	138	5.8	3	90	0	0	0	36.9	38	37.1	37.3	36.3	9.6	9.6	9.6	8.5
244	4	0	0.42	2	female	white	A2	W3	O	2	no	NA	NA	Infection neg. control	NA	NA	ABI7500-FastDx	Asuragen	strip tube	27.2701	20.535	20.4403	22.7041	4.4713	6.48311	4.4713	NA	NA	NA	121	91	117	88	143	4.8	NA	117	0	0	0	NA	NA	NA	NA	NA	15.9	15.9	15.9	9.9
245	4	0	0.92	2	female	white	A1	W2	N	3	yes	NA	NA	Infection neg. control	-0.83	Early Prophylactics	ABI7500-FastDx	Asuragen	strip tube	26.7149	18.8283	21.4735	21.5181	7.842	9.85819	7.842	1.13	4.5	7.3	81	70	96	68	133	3	2	112	0	0	0	37.6	38	NA	37	NA	13.5	15.2	15.2	10.9
246	4	0	0.21	2	male	white	A5	W1	U	2	yes	NA	NA	Infection neg. control	-0.54	Early Prophylactics	ABI7500-FastDx	Asuragen	strip tube	27.1124	20.7995	20.7357	23.2288	3.8198	5.83077	3.8198	0.08	2.9	7.25	62	48	84	47	84	5.9	5	122	0	1	0	NA	33.3	NA	31.3	NA	19.1	25	25	13.4
247	4	0	0.37	2	male	white	A4	W4	O	3	yes	NA	NA	Infection neg. control	-0.54	Early Prophylactics	ABI7500-FastDx	Asuragen	strip tube	22.4708	19.6205	21.8433	23.0236	1.67	3.67817	1.67	0.46	1	7.23	79	69	96	66	137	6.6	2	92	0	0	0	38.1	39.4	38.4	37.9	36.7	11.2	11.2	11.2	6.3
248	4	0	0.2	2	male	white	A5	W3	N	2	no	NA	NA	Infection neg. control	NA	NA	ABI7500-FastDx	Asuragen	strip tube	24.1504	20.3818	21.2642	22.5727	2.4601	4.4693	2.4601	0.72	2.7	7.41	73	53	57	53	78	7.5	NA	80	1	0	1	36.1	35.4	36.8	35.4	35.1	17.1	22.2	22.2	13.1
249	4	0	-0.04	2	male	white	A3	W3	N	3	yes	0	none	Infection neg. control	-0.04	NA	ABI7500-FastDx	Asuragen	strip tube	26.3651	16.0047	19.6101	20.652	9.3185	11.3366	9.3185	5.27	3.3	7.22	108	84	131	83	140	5.1	9	100	0	0	0	36.3	38.1	38.1	35.9	35	3.7	5.1	28.7	10.5
250	4	0	0.61	2	male	white	A8	W2	NA	2	no	NA	NA	Infection neg. control	NA	NA	ABI7500-FastDx	Asuragen	strip tube	25.5785	21.0613	21.0745	24.0764	1.5153	3.52327	1.5153	0.53	2.6	NA	90	84	102	NA	131	6.1	2	100	0	0	0	NA	NA	NA	NA	NA	11.3	11.3	11.3	11.1
251	4	0	0.17	2	male	white	A4	W4	Ob1	2	no	NA	NA	Infection neg. control	NA	NA	ABI7500-FastDx	Asuragen	strip tube	26.2985	19.2175	21.2834	22.2191	6.1453	8.15929	6.1453	0.42	1.4	NA	98	88	109	92	124	7.6	2	107	0	0	0	37.2	NA	NA	NA	NA	17.1	17.1	17.1	7.8
252	4	0	0.23	2	male	white	A4	W3	O	3	yes	NA	NA	Infection neg. control	-0.2	Early Prophylactics	ABI7500-FastDx	Asuragen	strip tube	24.0433	20.2337	22.9929	23.0524	3.7501	5.76098	3.7501	0.07	2.5	7.37	88	73	80	72	100	5.6	2	105	0	0	0	38.1	39.1	38.7	38.8	35.4	7.7	7.7	11.5	7.2
253	4	0	0.047	2	male	white	A5	W3	O	2	no	NA	NA	Infection neg. control	NA	NA	ABI7500-FastDx	Asuragen	strip tube	25.9279	19.3958	21.8773	22.4886	5.9208	7.9345	5.9208	NA	0.7	7.39	86	76	102	74	117	8.2	2	133	0	0	0	37.4	38	NA	36.3	NA	10.6	10.6	10.6	6.5
254	4	0	0.55	2	female	white	A6	W2	N	2	yes	NA	NA	Infection neg. control	-0.08	Early Prophylactics	ABI7500-FastDx	Asuragen	strip tube	26.4892	22.6017	20.5214	24.1274	0.2815	2.28787	0.2815	0.06	2.2	NA	73	68	79	NA	146	5.3	7	97	0	0	0	37.5	37.3	NA	36.9	NA	8.3	13.7	19	17.9
255	4	0	0.29	2	male	white	A5	W3	O	2	yes	NA	NA	Infection neg. control	-0.15	Early Prophylactics	ABI7500-FastDx	Asuragen	strip tube	24.3798	20.0276	20.3034	22.4286	2.227	4.2359	2.227	0.19	5.6	7.3	94	58	91	56	103	8.8	10	86	0	0	0	NA	NA	NA	NA	NA	12.5	14.1	14.1	10
256	4	0	0.45	2	male	white	A5	W2	NA	3	yes	NA	NA	Infection neg. control	-0.089	Early Prophylactics	ABI7500-FastDx	Asuragen	strip tube	24.561	19.6941	21.503	22.6117	3.7582	5.76909	3.7582	0.2	2.7	7.48	76	58	98	59	99	8.4	7	131	0	0	0	38.1	38	39	36.3	37.3	16	19.3	19.3	9.4
257	4	0	0.42	2	male	white	A5	W3	O	2	yes	NA	NA	Infection neg. control	-0.46	Early Prophylactics	ABI7500-FastDx	Asuragen	strip tube	23.2889	20.2683	21.8757	22.4543	2.442	4.45117	2.442	1.76	3.3	7.19	78	42	77	NA	112	8.1	10	90	0	1	0	37.2	38.3	37.4	35.4	34.2	13.2	15.1	15.1	10.3
258	4	0	0.15	2	female	white	A3	W4	Ob1	2	yes	NA	NA	Infection neg. control	-0.64	Early Prophylactics	ABI7500-FastDx	Asuragen	strip tube	24.5852	20.1366	20.3724	23.0047	1.8163	3.82466	1.8163	NA	5.7	7.22	70	64	113	64	113	6.6	8	109	0	1	0	NA	NA	NA	NA	NA	18.4	40.5	40.5	20.5
259	4	0	0.66	2	female	white	A2	W3	N	2	yes	NA	NA	Infection neg. control	-0.88	Early Prophylactics	ABI7500-FastDx	Asuragen	strip tube	27.2133	18.8457	22.3051	23.1546	7.5181	9.53387	7.5181	1.42	2.4	7.38	99	72	80	70	114	5.9	4	92	0	0	0	37.5	37.5	37.5	35.1	35.1	6.4	7.4	7.4	10.5
260	4	0	0.26	2	female	NA	A5	W3	O	2	yes	NA	NA	Infection neg. control	-0.49	Early Prophylactics	ABI7500-FastDx	Asuragen	strip tube	24.976	21.2272	22.9459	23.8723	2.8224	4.83207	2.8224	0.06	0.5	7.38	80	55	95	54	107	7	9	125	0	0	0	35.4	35.6	36.7	35.1	33.5	5.7	6.9	6.9	6.6
261	4	0	0.41	2	female	white	A4	W4	Ob2	3	yes	NA	NA	Infection neg. control	-0.019	Early Prophylactics	ABI7500-FastDx	Asuragen	strip tube	26.8465	21.0989	21.4036	23.257	3.8942	5.90526	3.8942	2.33	1.9	7.4	79	69	119	67	119	5.7	NA	105	0	1	0	37.3	38.1	38.6	37.3	37.2	19.6	19.6	19.6	10.7
262	4	0	0.059	2	male	white	A4	W4	O	2	no	NA	NA	Infection neg. control	NA	NA	ABI7500-FastDx	Asuragen	strip tube	24.8861	20.9075	21.0136	22.7805	2.2117	4.22058	2.2117	1.07	4.1	7.31	90	82	94	81	95	8.6	3	95	0	0	0	37.6	37.6	37.6	36.6	36.5	12.4	16.2	16.2	10.2
263	4	0	0.011	2	female	white	A6	W2	N	3	no	NA	NA	Infection neg. control	NA	NA	ABI7500-FastDx	Asuragen	strip tube	26.6189	21.1834	22.2065	23.8779	3.7641	5.77499	3.7641	NA	1.1	7.34	83	73	108	69	110	5.4	6	84	0	0	0	36.4	36.7	36.6	35.7	35.9	12.5	12.5	12.5	8.8
264	4	0	0.38	2	male	white	A5	W5	Ob3	2	yes	NA	NA	Infection neg. control	-0.33	Early Prophylactics	ABI7500-FastDx	Asuragen	strip tube	25.0973	21.3571	21.7283	22.6781	2.7904	4.80003	2.7904	0.27	2.8	7.42	95	84	140	80	140	8.3	6	112	0	0	0	36.7	37.9	37.2	37	36	10.2	10.8	10.8	10.8
265	4	0	0.4	2	female	white	A8	W2	N	3	yes	NA	NA	Infection neg. control	0.0062	Early Prophylactics	ABI7500-FastDx	Asuragen	strip tube	25.8482	20.4432	21.0231	22.6133	3.8148	5.82576	3.8148	0.8	0.7	7.09	105	85	131	84	154	5.4	7	116	0	0	0	36.3	37.3	36.3	37	33.1	NA	NA	NA	11.6
266	4	0	0.77	2	female	white	A5	W2	O	3	no	NA	NA	Infection neg. control	NA	NA	ABI7500-FastDx	Asuragen	strip tube	27.2136	19.2426	22.0596	23.0124	7.0182	9.03332	7.0182	0.56	3.6	7.51	77	63	113	60	113	5.7	8	97	0	0	1	36	36.4	38.1	36.4	33.5	3.4	8.7	8.7	11.8
267	4	0	0.63	2	female	white	A2	W3	N	2	yes	NA	NA	Infection neg. control	-0.91	Early Prophylactics	ABI7500-FastDx	Asuragen	strip tube	26.3825	18.352	22.0877	22.868	7.2502	9.26563	7.2502	5.27	11.1	7.16	87	60	219	58	219	5.4	NA	119	0	0	0	36.8	36.8	36.8	35.7	35.7	4.7	7.5	7.5	8.2
268	4	0	0.32	2	male	white	A6	W3	O	2	yes	NA	NA	Infection neg. control	-0.094	Early Prophylactics	ABI7500-FastDx	Asuragen	strip tube	27.0744	22.2435	22.4252	24.0064	3.2497	5.25992	3.2497	0.19	5.3	7.24	93	70	133	70	138	5.2	7	106	0	1	0	36.7	38.6	NA	36.7	NA	18.4	18.4	18.4	15.6
269	4	0	0.15	2	female	white	A5	W2	N	2	no	NA	NA	Infection neg. control	NA	NA	ABI7500-FastDx	Asuragen	strip tube	24.8025	20.057	21.6309	23.1829	3.1935	5.20365	3.1935	3.98	1.4	NA	90	86	117	85	122	3.9	2	122	0	0	0	36.5	NA	NA	NA	NA	6	8.9	8.9	6.4
270	4	0	0.87	2	female	white	A1	W2	N	2	yes	NA	NA	Infection neg. control	-0.046	Early Prophylactics	ABI7500-FastDx	Asuragen	strip tube	23.3282	19.1532	22.1008	21.8	4.4758	6.48762	4.4758	<0.02	1	7.42	97	79	116	79	116	4.5	7	109	0	0	0	37.2	37.5	37.4	35.5	33.5	11	11	11	8.6
271	4	0	0.17	2	female	white	A1	W3	O	2	yes	NA	NA	Infection neg. control	-0.47	Early Prophylactics	ABI7500-FastDx	Asuragen	strip tube	25.648	20.6008	22.0168	23.2665	3.7975	5.80844	3.7975	0.1	10.7	NA	120	67	161	78	167	6.9	6	125	0	0	0	36.9	NA	NA	NA	NA	10.5	13.2	13.2	7.2
272	4	0	0.72	2	male	white	A1	W2	N	2	no	NA	NA	Infection neg. control	NA	NA	ABI7500-FastDx	Asuragen	strip tube	25.3005	19.7223	22.3792	23.2725	4.6849	6.69699	4.6849	0.34	NA	NA	121	91	108	83	130	5.4	3	89	0	0	0	38.1	39.1	38.2	38.3	37.3	11.1	11.1	11.1	6.9
273	4	0	0.78	2	male	white	A7	W2	N	2	yes	NA	NA	Infection neg. control	0.073	Early Prophylactics	ABI7500-FastDx	Asuragen	strip tube	27.7507	22.1846	21.1227	23.9576	2.7312	4.74075	2.7312	0.04	0.6	NA	70	50	87	49	97	7.3	4	128	0	0	0	NA	38.3	NA	35.9	NA	4.1	4.1	4.1	8.1
274	4	0	0.39	2	male	white	A5	W2	N	2	no	NA	NA	Infection neg. control	NA	NA	ABI7500-FastDx	Asuragen	strip tube	29.4014	23.1356	21.0316	23.4202	3.8772	5.88824	3.8772	2.26	2.2	NA	102	90	115	87	121	6.9	5	111	1	0	0	36.5	38.1	37.1	37.3	36.3	19.5	19.5	19.5	16.1
275	4	0	0.17	2	male	white	A5	W3	O	2	no	NA	NA	Infection neg. control	NA	NA	ABI7500-FastDx	Asuragen	strip tube	28.1188	21.1387	22.0386	23.7575	5.2612	7.27404	5.2612	6.28	1.4	NA	85	64	84	62	111	7.5	4	143	0	0	0	NA	39.4	NA	37.8	NA	5.5	6.3	6.3	14.5
276	4	0	0.24	2	male	white	A3	W4	O	3	yes	NA	NA	Infection neg. control	-0.39	Early Prophylactics	ABI7500-FastDx	Asuragen	strip tube	25.0202	18.9623	20.0187	21.4496	4.627	6.63902	4.627	25.79	11.5	6.98	97	86	105	84	106	7.2	11	78	0	0	0	32.7	34.4	34.3	32.6	32.2	22.2	22.2	22.2	17.8
277	4	0	0.17	2	female	white	A7	W4	Ob2	2	yes	NA	NA	Infection neg. control	-0.58	Early Prophylactics	ABI7500-FastDx	Asuragen	strip tube	26.207	22.4093	22.9873	23.7402	3.0448	5.05476	3.0448	0.16	0.7	7.24	92	77	119	73	119	8.3	5	104	0	0	0	35.9	37	36.9	35.2	33.8	7.6	8.3	8.3	8.9
278	4	0	0.24	2	female	white	A6	W1	N	2	yes	NA	NA	Infection neg. control	-0.59	Early Prophylactics	ABI7500-FastDx	Asuragen	strip tube	26.1432	20.908	22.1076	23.8	3.5428	5.55341	3.5428	3.97	0.9	NA	95	91	111	90	111	5.1	NA	109	0	0	0	36.9	NA	NA	NA	NA	14.8	23.3	23.3	9.2
279	4	0	0.067	2	female	white	A5	W1	N	2	yes	NA	NA	Infection neg. control	-0.68	Early Prophylactics	ABI7500-FastDx	Asuragen	strip tube	24.2175	20.3052	20.9126	22.3085	2.5164	4.52567	2.5164	0.32	2.4	NA	62	59	82	59	82	6.8	2	100	0	0	0	35.9	37	36	35.6	34.6	8.9	10.2	10.2	11.1
280	4	0	0.25	2	male	white	A5	W4	NA	3	yes	-0.2	none	Infection neg. control*	-0.21	NA	ABI7500-FastDx	Asuragen	strip tube	25.1878	19.09	23.0365	23.1476	5.9867	8.00048	5.9867	0.9	3.3	NA	104	85	102	83	117	5.9	5	97	1	1	0	38.9	40	39	38	34.3	2.5	2.7	2.7	15.6
281	4	0	0.36	2	male	white	A6	W3	O	2	yes	-1	none	Infection neg. control*	-0.017	NA	ABI7500-FastDx	Asuragen	strip tube	25.7501	19.031	21.5077	22.3148	5.912	7.92569	5.912	3.17	6.3	7.22	88	70	91	61	105	8.8	11	81	0	1	0	36.6	38.3	38.2	36.5	36.5	8.6	9.8	11.9	11.6
282	4	0	0.25	2	female	white	A6	W3	Ob1	3	yes	0.7	none	Infection neg. control*	-0.29	Early Prophylactics	ABI7500-FastDx	Asuragen	strip tube	25.0295	21.0571	21.0011	22.9814	1.9921	4.00069	1.9921	0.2	4	7.18	74	46	77	43	88	5.8	11	80	1	1	0	35.8	35.9	36	32.1	32.1	12.8	14	14	20.1
283	4	0	0.069	2	male	white	A5	W3	N	3	yes	-0.6	none	Infection neg. control*	-0.62	Early Prophylactics	ABI7500-FastDx	Asuragen	strip tube	26.6014	20.5024	21.0776	22.6261	4.5505	6.56242	4.5505	41.31	9.7	7.09	109	76	93	75	119	8.2	10	82	0	0	0	33.6	34.8	36.7	33.8	32.8	16.9	27.4	27.4	16.6
284	4	0	0.44	2	female	white	A6	W2	N	2	yes	-2.8	none	Infection neg. control*	-0.82	NA	ABI7500-FastDx	Asuragen	strip tube	24.3626	19.3999	21.3608	22.1965	4.127	6.13837	4.127	0.06	1	7.32	91	61	119	39	143	7.9	NA	165	0	0	0	37.1	NA	NA	NA	NA	7.7	7.7	7.7	12.3
285	4	0	0.37	2	female	white	A4	W5	Ob3	2	yes	0	none	Infection neg. control*	-0.0049	NA	ABI7500-FastDx	Asuragen	strip tube	25.3279	21.3866	20.1454	23.5895	0.4972	2.50385	0.4972	0.66	1.5	7.32	70	58	68	56	92	7.9	NA	130	0	0	0	36.5	37.2	37.2	34.7	34.7	14.8	18.3	18.3	8.7
286	4	0	0.25	2	female	white	A5	W3	O	4	yes	-0.1	none	Infection neg. control*	-0.13	NA	ABI7500-FastDx	Asuragen	strip tube	25.2448	20.2067	20.5105	22.2678	3.2808	5.29107	3.2808	0.06	10.3	NA	110	52	139	78	146	5.8	11	88	0	0	1	35.3	35.8	36.5	34.7	33	14.1	14.1	15.6	19.3
287	4	0	0.18	2	male	white	A1	W4	Ob1	3	yes	-0.2	none	Infection neg. control*	-0.2	NA	ABI7500-FastDx	Asuragen	strip tube	25.2163	18.6759	22.1742	23.4061	5.3085	7.3214	5.3085	NA	1.9	7.36	113	76	115	68	115	8.3	NA	75	0	0	0	38	39.1	38.1	37.1	35.5	7.6	7.6	7.6	7.8
288	4	0	0.37	2	female	white	A5	W5	Ob3	2	yes	-0.1	none	Infection neg. control*	-0.088	NA	ABI7500-FastDx	Asuragen	strip tube	26.2057	22.0403	23.4729	23.5645	4.0738	6.0851	4.0738	0.74	1.3	NA	94	75	122	74	133	7.1	2	134	1	1	0	36.3	36.9	NA	36.9	NA	10.6	10.6	10.6	14.4
289	5	0	0.21	2	male	asian	A3	W3	N	2	NA	-0.6	possible	Indeterminate	-0.63	NA	ABI7500-FastDx	TaqMan	strip tube	32.78	26.94	24.98	25.09	5.7	5.7	3.6913	0.1	0.9	7.28	96	83	111	76	117	9.4	5	218	1	0	0	NA	37	NA	35.1	NA	9.8	11.2	11.2	9.6
290	5	0	0.4	2	male	asian	A2	W2	N	2	NA	0	possible	Indeterminate	-0.041	NA	ABI7500-FastDx	TaqMan	strip tube	31.51	22.37	24.33	22.5	11	11	8.986	7.08	1.1	NA	71	66	119	73	119	8.4	2	101	0	0	0	36.5	37.8	38.3	37.5	33.1	11.9	12.4	15.8	6.8
291	5	0	0.53	2	female	black	A5	W2	N	3	NA	-0.2	possible	Indeterminate	-0.22	NA	ABI7500-FastDx	TaqMan	strip tube	30.39	25.39	23.3	24.08	4.2	4.2	2.1928	0.63	13	7.31	83	51	66	49	108	6.2	4	84	1	0	0	36.2	37.1	37.6	31.1	31.1	11.6	11.6	11.6	9.8
292	5	0	0.5	2	male	black	A4	W3	Ob1	4	NA	-0.9	possible	Indeterminate	0.084	NA	ABI7500-FastDx	TaqMan	strip tube	30.11	20.94	23.45	22.28	10.4	10.4	8.3866	249	1.4	NA	109	105	124	102	140	7.6	9	92	0	1	1	38.5	38.7	38.8	37.7	NA	15.6	17.4	17.4	9
293	5	0	0.19	2	male	black	A2	W1	U	3	NA	-0.6	possible	Indeterminate	-0.56	NA	ABI7500-FastDx	TaqMan	strip tube	30.44	24.56	24.42	23.15	7.1	7.1	5.0899	26.45	1.7	NA	115	98	137	88	137	3.8	3	71	0	0	0	36.7	NA	NA	NA	NA	25.5	29.6	29.6	7.2
294	5	0	0.48	2	female	black	A1	W4	Ob2	3	NA	-0.9	possible	Indeterminate	-0.93	NA	ABI7500-FastDx	TaqMan	strip tube	32.36	25.59	24.65	24.57	6.9	6.9	4.8901	0.1	1.6	7.49	116	92	146	98	154	5.1	7	156	0	0	0	36.8	36.9	37	36	35	18.4	18.4	18.4	7.4
295	5	0	0.65	2	male	black	A5	W5	Ob1	3	NA	-1.7	possible	Indeterminate	0.3	NA	ABI7500-FastDx	TaqMan	strip tube	29.99	23.15	25.32	23.81	8.4	8.4	6.3886	0.16	0.6	7.39	104	74	78	72	164	8	2	118	0	0	0	38.5	39.9	39.6	38.7	35.1	5	6.8	6.8	7.6
296	5	0	0.044	2	female	black	A5	W4	Ob1	2	NA	-0.6	possible	Indeterminate	-0.61	NA	ABI7500-FastDx	TaqMan	strip tube	29.35	22.47	24.48	22.71	8.6	8.6	6.5884	138.3	2.7	7.15	84	69	110	71	121	5.8	13	104	1	1	1	NA	38.8	NA	38.1	NA	9.5	17.9	17.9	12.2
297	5	0	-0.38	2	female	black	A4	W4	Ob1	2	NA	-0.4	possible	Indeterminate	-0.38	NA	ABI7500-FastDx	TaqMan	strip tube	32.2	26.28	23.63	23.94	5.6	5.6	3.5914	0.13	2	7.33	72	51	76	50	77	5.7	7	91	0	0	0	36.3	37.7	37	35.7	34.3	6.1	7.7	7.7	10.1
298	5	0	0.98	2	male	black	A2	W2	N	3	NA	-1.8	possible	Indeterminate	-0.82	NA	ABI7500-FastDx	TaqMan	strip tube	32.7	25.03	26.34	24.39	9.6	9.6	7.5874	2.93	0.9	7.37	98	48	108	48	138	6.4	6	184	0	0	1	36.4	37.6	36.7	37	36	17.8	17.8	17.8	6.3
299	5	0	0.16	2	NA	black	A3	W4	Ob1	3	NA	-0.5	possible	Indeterminate	-0.55	NA	ABI7500-FastDx	TaqMan	strip tube	30.35	21.78	24.53	23.05	10	10	7.987	NA	1.1	NA	NA	81	105	79	115	7.8	NA	78	0	1	0	NA	36.5	NA	36.3	NA	NA	NA	NA	9.9
300	5	0	0.03	1	female	black	A3	W2	N	4	NA	-0.4	probable	Sepsis	-0.41	NA	ABI7500-FastDx	TaqMan	strip tube	30.12	21.94	23.72	23.6	8.3	8.3	6.2887	117.5	11.2	7.39	122	109	125	115	140	6.5	14	81	0	0	1	37.1	38.1	38.1	34.5	34.3	8.4	13	13	48.2
301	5	0	0.12	2	female	black	A6	W2	O	3	NA	-0.5	probable	Sepsis	-0.55	NA	ABI7500-FastDx	TaqMan	strip tube	32.07	22.45	24.37	23.66	10.3	10.3	8.2867	279.5	8	7.09	112	94	123	NA	145	5.3	15	89	0	0	1	36	36.1	36.6	35.7	34.4	6.7	8.3	8.3	14.2
302	5	0	0.072	2	female	asian	A2	W2	O	3	NA	-0.6	probable	Sepsis	-0.65	NA	ABI7500-FastDx	TaqMan	strip tube	33.78	24.2	25.69	24.4	10.9	10.9	8.8861	1.56	NA	NA	118	79	97	79	130	4.4	NA	88	0	0	0	40.1	35.1	40.4	35.1	36.6	3	3	3	5.7
303	5	0	0.46	2	male	asian	A2	W2	N	4	NA	-0.2	culture proven	Sepsis	-0.21	NA	ABI7500-FastDx	TaqMan	strip tube	30.71	22.09	23.89	22.83	9.7	9.7	7.6873	9.25	1.5	7.41	86	65	107	63	135	6.1	4	93	0	0	0	37.5	37.8	37.8	37.5	36	12.2	13.6	13.6	12.3
304	5	0	-0.019	2	female	asian	A4	W2	O	2	NA	-1	culture proven	Sepsis	-0.019	NA	ABI7500-FastDx	TaqMan	strip tube	29.91	22.85	24.52	23.28	8.3	8.3	6.2887	0.43	NA	7.41	80	69	80	69	96	6	3	96	1	0	0	36	38.1	37.1	36.7	35.5	9.7	12.8	12.8	14.6
305	5	0	0.065	2	male	black	A4	W5	NA	4	NA	-0.9	culture proven	Sepsis	0.051	NA	ABI7500-FastDx	TaqMan	strip tube	28.93	22.2	25.28	23.24	8.8	8.8	6.7882	85.58	20.1	NA	103	69	124	NA	128	6.3	11	85	0	1	1	NA	37.8	NA	36.7	NA	2.1	2.2	2.2	8.4
306	5	0	0.52	2	male	asian	A6	W3	N	4	NA	-0.7	probable	Sepsis	-0.68	NA	ABI7500-FastDx	TaqMan	strip tube	29.05	24.45	23.63	22.88	5.3	5.3	3.2917	1.62	9.2	7.32	79	72	162	67	162	6	7	97	0	0	1	36.4	37.2	37.2	34.3	33.1	13	13.9	13.9	12.1
307	5	0	0.47	2	female	black	A5	W2	N	2	NA	-0.9	culture proven	Sepsis	0.053	NA	ABI7500-FastDx	TaqMan	strip tube	32.94	20.63	23.71	23.19	12.8	12.8	10.7842	7.25	7.2	NA	117	115	132	113	145	4.6	7	100	1	0	0	37.3	37.3	37.4	36.9	36.2	3.4	4	4	4.9
308	5	0	0.37	2	male	black	A3	W3	O	3	NA	-1	probable	Sepsis	-0.0069	NA	ABI7500-FastDx	TaqMan	strip tube	30.5	22.11	23.75	23.27	8.9	8.9	6.8881	5.13	1.4	NA	102	83	120	76	127	7.7	NA	107	1	0	0	35.9	38.4	37.4	36.8	35.1	13	13.3	13.3	10
309	5	0	0.24	2	female	black	A3	W2	N	4	NA	-0.4	culture proven	Sepsis	-0.39	NA	ABI7500-FastDx	TaqMan	strip tube	31.35	21.92	23.83	23.57	9.7	9.7	7.6873	2.4	1.7	7.18	87	75	131	44	131	2.9	10	79	1	1	0	36	34.3	38	32.5	33.9	6.1	6.1	12.9	10.5
310	5	0	0.29	2	female	asian	A4	W2	N	2	NA	-0.7	probable	Sepsis	-0.73	NA	ABI7500-FastDx	TaqMan	strip tube	33.66	21.04	23.39	22.37	13.6	13.6	11.5834	99.9	2.8	7.38	113	89	108	89	131	10	NA	99	0	0	0	37.7	38.2	38.2	36.7	36.5	NA	NA	NA	8.6
311	5	0	0.63	2	male	black	A6	W3	Ob1	2	NA	0	culture proven	Sepsis	0.043	NA	ABI7500-FastDx	TaqMan	strip tube	32.51	25.72	24.65	24.38	7.1	7.1	5.0899	NA	1.1	NA	63	61	90	60	91	5.4	NA	81	0	1	1	36	39.1	NA	38.9	NA	14.8	14.8	14.8	22
312	5	0	0.77	2	male	black	A3	W3	N	2	NA	-1	culture proven	Sepsis	-0.024	NA	ABI7500-FastDx	TaqMan	strip tube	31.2	24.78	24.25	23.95	6.7	6.7	4.6903	0.42	2.5	7.29	122	93	161	78	161	7.5	3	179	0	0	0	37.3	38.4	NA	36.7	NA	10.6	13.6	13.6	11.1
313	5	0	0.18	2	female	black	A4	W1	U	3	NA	-0.2	culture proven	Sepsis	-0.18	NA	ABI7500-FastDx	TaqMan	strip tube	29.49	24.13	22.89	22.85	5.4	5.4	3.3916	0.2	2.1	7.35	114	105	147	108	147	5.9	8	91	0	0	0	NA	34.1	NA	34.1	NA	34.9	34.9	47.7	16.6
314	5	0	0.044	2	female	black	A2	W2	N	3	NA	-0.7	culture proven	Sepsis	-0.71	NA	ABI7500-FastDx	TaqMan	strip tube	34.7	22.98	25.67	25.41	12	12	9.985	15.5	2.8	7.22	114	111	131	103	135	4.2	9	95	0	0	1	37.9	37.9	38	NA	35.3	1	2.7	2.7	10.4
315	5	0	0.46	2	male	black	A4	W2	N	3	NA	-1.2	probable	Sepsis	-0.16	NA	ABI7500-FastDx	TaqMan	strip tube	30.11	22.81	23.25	22.75	7.8	7.8	5.7892	152.3	2.4	7.5	107	84	124	65	124	4.9	8	134	0	0	0	36.4	37.5	37.2	36.4	33.5	22.1	22.1	23.1	14.6
316	5	0	0.14	2	female	black	A1	W2	N	2	NA	-0.4	probable	Sepsis	-0.45	NA	ABI7500-FastDx	TaqMan	strip tube	31.14	24.01	22.53	23.02	6.6	6.6	4.5904	178.9	2.4	NA	64	60	143	58	143	4.3	8	109	0	0	1	35.3	38.7	38.7	35.5	35.1	11.7	13	13	5.6
317	5	0	0.51	2	male	black	A5	W3	N	3	NA	-0.9	probable	Sepsis	-0.9	NA	ABI7500-FastDx	TaqMan	strip tube	32.96	22.14	23.87	23.99	10.7	10.7	8.6863	61.08	4.8	7.06	95	87	115	85	115	5.6	14	94	0	0	0	NA	37.1	NA	36.3	NA	3.9	4.1	4.1	12.1
318	5	0	0.35	2	female	black	A6	W2	O	4	NA	-0.1	culture proven	Sepsis	-0.1	NA	ABI7500-FastDx	TaqMan	strip tube	30.36	24.23	23.88	23.54	6.5	6.5	4.4905	6.21	3.6	7.37	102	80	107	55	122	4.9	8	78	0	1	0	35.8	37.2	38.4	33.2	32.2	9	9	12.3	11.7
319	5	0	0.046	1	female	black	A3	W5	Ob2	4	NA	-1	probable	Sepsis	-0.049	NA	ABI7500-FastDx	TaqMan	strip tube	31.38	22.03	25.33	23.19	11.5	11.5	9.4855	37.54	1.8	7.2	124	115	130	124	149	6.8	10	112	1	1	0	40.5	40.7	40.7	38.2	38.6	13.1	15.6	14	8.6
320	5	0	0.21	1	female	black	A1	W4	Ob2	2	NA	-1.7	culture proven	Sepsis	-0.68	NA	ABI7500-FastDx	TaqMan	strip tube	32.73	21.37	24.31	23.99	11.7	11.7	9.6853	9.8	2.5	7.28	112	107	133	106	147	6	7	103	0	0	1	35.9	39	38.9	35.6	35.7	6.2	6.6	6.6	6.2
321	5	0	0.041	1	male	asian	A1	W2	N	4	yes	NA	NA	Infection neg. control	-0.5	Early Prophylactics	ABI7500-FastDx	TaqMan	strip tube	29.66	25.86	23.79	25.25	2.4	2.4	0.3946	1.67	5.6	7.45	105	93	123	93	130	4.1	11	107	0	0	0	32.1	36	36	34.8	32.1	5.8	20.6	20.6	9.5
322	5	0	0.033	1	female	asian	A6	W2	N	2	yes	NA	NA	Infection neg. control	-0.8	Early Prophylactics	ABI7500-FastDx	TaqMan	strip tube	31.56	25.37	22.84	24.24	4.8	4.8	2.7922	NA	NA	NA	81	67	74	67	108	6.5	4	154	1	1	0	36.3	36.5	36.5	35.3	35.3	NA	NA	NA	11.9
323	5	0	0.083	1	male	asian	A2	W2	U	3	yes	NA	NA	Infection neg. control	-0.56	Early Prophylactics	ABI7500-FastDx	TaqMan	strip tube	29.16	25.92	22.78	23.19	2.8	2.8	0.7942	<0.02	3.3	7.42	80	55	61	55	96	4	11	120	0	0	0	37.8	37.8	38.3	34.8	34.8	12.7	20	20	6.5
324	5	0	0.019	1	female	asian	A2	W2	O	3	yes	NA	NA	Infection neg. control	-0.62	Early Prophylactics	ABI7500-FastDx	TaqMan	strip tube	29.68	25.03	22.71	23.94	3.4	3.4	1.3936	6.57	3.3	7.38	149	91	112	105	151	5.1	10	104	0	0	1	35.3	37.1	38	36.7	35.3	14.1	17.9	17.9	10.3
325	5	0	0.035	1	male	black	A4	W2	N	3	yes	NA	NA	Infection neg. control	-0.48	Early Prophylactics	ABI7500-FastDx	TaqMan	strip tube	30.42	24.66	23.13	24.72	4.2	4.2	2.1928	2	13.3	7.44	126	88	92	87	144	5.6	13	103	1	1	1	34.7	37.2	37.2	36.3	34.5	11.6	11.9	11.9	16.1
326	5	0	0.019	1	male	black	A2	W4	O	3	yes	NA	NA	Infection neg. control	-0.61	Early Prophylactics	ABI7500-FastDx	TaqMan	strip tube	32.68	24.92	25.34	25.24	7.9	7.9	5.8891	5.02	5	7.39	93	78	92	78	141	7	7	116	0	0	1	37.1	37.8	37.8	35.1	35.1	2.2	12.1	13.1	8.7
327	5	0	0.14	2	female	asian	A4	W1	N	2	yes	NA	NA	Infection neg. control	-0.27	Early Prophylactics	ABI7500-FastDx	TaqMan	strip tube	31.65	25.52	24.54	24.56	6.1	6.1	4.0909	0.07	0.7	NA	105	86	108	87	130	5.9	1	194	0	0	0	36.6	38.4	37.4	37.4	34.8	9.7	10.7	10.7	7.7
328	5	0	0.2	1	female	asian	A2	W3	O	3	yes	NA	NA	Infection neg. control	-0.64	Early Prophylactics	ABI7500-FastDx	TaqMan	strip tube	29.32	25.01	23.35	23.07	4.6	4.6	2.5924	0.66	1.2	7.29	89	44	98	44	101	7.9	11	140	0	0	0	36.2	36.4	37.6	32.4	33	11.2	16.9	16.9	17.8
329	5	0	0.54	2	male	black	A1	W3	O	2	no	NA	NA	Infection neg. control	NA	NA	ABI7500-FastDx	TaqMan	strip tube	29.91	24.38	24.35	24.09	5.8	5.8	3.7912	5.34	NA	NA	95	82	110	77	121	6.8	2	96	0	0	0	NA	36.9	NA	36.3	NA	5.2	8.4	8.4	8.2
330	5	0	0.18	2	male	black	A1	W2	N	3	no	NA	NA	Infection neg. control	NA	NA	ABI7500-FastDx	TaqMan	strip tube	30.39	24.9	24.63	24.46	5.7	5.7	3.6913	0.33	1.1	7.38	83	61	85	60	111	8.1	NA	98	0	0	0	NA	37.3	NA	36	NA	4.3	16.1	16.1	8.9
331	5	0	0.5	2	male	black	A6	W3	N	3	no	NA	NA	Infection neg. control	NA	NA	ABI7500-FastDx	TaqMan	strip tube	31.24	24.37	24.53	24.07	7.3	7.3	5.2897	5.31	2.5	7.51	78	71	130	70	130	3.6	NA	99	0	0	0	36.2	38.8	37.8	37.1	36.1	13.3	15.8	15.8	11.8
332	5	0	0.11	2	female	black	A6	W4	Ob2	4	yes	NA	NA	Infection neg. control	-0.3	Early Prophylactics	ABI7500-FastDx	TaqMan	strip tube	30.31	25.81	25.26	24.92	4.8	4.8	2.7922	NA	11.7	7.29	107	47	158	46	158	6.7	12	89	0	0	0	36	37.1	37.7	34.5	33.1	10.3	12.8	12.8	11.1
333	5	0	0.82	2	female	asian	A3	W1	N	2	no	NA	NA	Infection neg. control	NA	NA	ABI7500-FastDx	TaqMan	strip tube	29.74	24.63	23.44	23.81	4.7	4.7	2.6923	0.11	4.8	NA	103	79	92	75	137	7.9	NA	117	0	0	0	NA	38.2	NA	37.3	NA	12	22.1	22.1	17
334	5	0	-0.09	2	male	black	A4	W4	Ob2	3	yes	NA	NA	Infection neg. control	-0.09	Early Prophylactics	ABI7500-FastDx	TaqMan	strip tube	29.81	23.96	24.57	24.38	6	6	3.991	14.8	5.4	NA	92	45	83	66	105	7.2	12	98	1	0	0	33.4	35.2	36.3	33.5	32.1	7.5	7.5	7.5	24.7
335	5	0	0.43	2	female	asian	A6	W2	N	2	no	NA	NA	Infection neg. control	NA	NA	ABI7500-FastDx	TaqMan	strip tube	28.24	24.88	23.28	23.21	3.4	3.4	1.3936	6.29	0.9	7.37	86	57	64	56	101	4.2	9	80	0	1	0	37.6	38	38.1	36.1	36.1	NA	NA	NA	9.6
336	5	0	0.15	2	male	asian	A3	W2	N	2	yes	NA	NA	Infection neg. control	-0.49	Early Prophylactics	ABI7500-FastDx	TaqMan	strip tube	30.3	24.92	25.43	24.53	6.3	6.3	4.2907	0.06	1.3	7.33	104	66	109	66	123	7.1	5	101	0	1	0	NA	38.9	NA	38.6	NA	9.2	10.7	10.7	7
337	5	0	0.29	2	male	black	A6	W3	O	2	yes	NA	NA	Infection neg. control	-0.42	Early Prophylactics	ABI7500-FastDx	TaqMan	strip tube	29.21	24.3	24.73	23.7	5.9	5.9	3.8911	5.72	1.1	7.42	67	65	118	64	118	5.1	7	107	0	NA	0	35.4	37.5	36.9	36	33.6	6.4	8.7	8.7	9.5
338	5	0	0.74	2	male	black	A3	W3	N	2	no	NA	NA	Infection neg. control	NA	NA	ABI7500-FastDx	TaqMan	strip tube	31.16	24.81	24.69	23.84	7.2	7.2	5.1898	0.04	2.3	7.38	81	68	106	67	156	10	NA	141	0	0	0	37.2	36.2	NA	35.5	NA	11.5	11.5	11.5	9.4
339	5	0	0.61	2	male	asian	A6	W3	O	2	yes	NA	NA	Infection neg. control	0.068	Early Prophylactics	ABI7500-FastDx	TaqMan	strip tube	29	23.84	22.98	22.7	5.4	5.4	3.3916	<0.02	3.4	7.47	75	61	95	60	110	7.8	2	169	0	0	0	37.9	38.5	38.7	35.9	35.7	9.6	12	12	7.9
340	5	0	0.36	2	male	asian	A6	W2	N	2	no	NA	NA	Infection neg. control	NA	NA	ABI7500-FastDx	TaqMan	strip tube	30.01	24.71	23.23	23.67	4.9	4.9	2.8921	2.15	2.7	NA	97	91	121	84	121	5.2	NA	92	0	1	0	35.5	38.1	37.1	36.4	34.2	20.8	23.8	23.8	9.2
341	5	0	0.67	2	male	black	A2	W4	O	3	yes	NA	NA	Infection neg. control	-0.85	Early Prophylactics	ABI7500-FastDx	TaqMan	strip tube	29.98	23.34	24.11	23.43	7.3	7.3	5.2897	5.74	5	7.32	72	56	112	NA	123	8.5	8	190	0	0	1	NA	32.4	NA	32.3	NA	15.8	19.8	19.8	9.3
342	5	0	0.25	2	male	black	A2	W2	N	2	no	NA	NA	Infection neg. control	NA	NA	ABI7500-FastDx	TaqMan	strip tube	29.45	24.56	24.96	24.12	5.7	5.7	3.6913	0.78	2	7.3	90	79	120	80	120	NA	5	121	1	1	0	NA	37.2	NA	35.4	NA	9.4	9.4	9.5	35.4
343	5	0	0.058	1	female	asian	A4	W3	O	2	yes	NA	NA	Infection neg. control	-0.57	Early Prophylactics	ABI7500-FastDx	TaqMan	strip tube	31.48	26.18	22.31	24.5	3.1	3.1	1.0939	NA	NA	NA	70	63	66	63	92	5.6	3	90	0	1	0	36.8	36.8	36.8	35.4	35.7	NA	NA	NA	9.6
344	5	0	0.33	2	male	black	A5	W1	U	4	yes	-0.5	none	Infection neg. control*	-0.5	NA	ABI7500-FastDx	TaqMan	strip tube	27.87	24.06	23.92	23.58	4.2	4.2	2.1928	65.61	4.2	7.12	123	115	141	113	146	8.1	11	87	0	0	0	36.3	37.6	37.6	36.2	35.5	27.7	28	28	10.6
345	5	0	0.31	2	female	asian	A5	W1	N	2	yes	-0.1	none	Infection neg. control*	-0.11	NA	ABI7500-FastDx	TaqMan	strip tube	28.66	24.12	23.45	23.29	4.7	4.7	2.6923	0.71	3.1	7.38	71	62	96	64	133	7.2	1	126	1	1	0	37.3	39.4	39.4	36.3	33.2	15.1	15.1	15.1	24.6
[truncated: 25 more columns]

## Sheet: KEY - Validation Cohorts
cell contents	definition
NA	data not available / not recorded
Infection neg. control*	reclassified patient (see Figure 1)
BMI has been converted to an ordinal variable, using the following scale:
Symbol	Meaning	range (kg/m2)
U	underweight	< 18.5
N	normal	18.5 - 24.9
O	overweight	25.0 - 29.9
Ob1	obese, class 1	30.0 - 34.9
Ob2	obese, class 2	35.0 - 39.9
Ob3	obese, class 3 (extreme)	40.0 and above
Classification by US NIH Heart, Lung & Blood Institute
http://www.nhlbi.nih.gov/health/educational/lose_wt/BMI/bmi_dis.htm
Age has been converted to an ordinal variable, using the following scale:
Symbol	Range (years)
A1	18-30
A2	30-40
A3	40-50
A4	50-60
A5	60-70
A6	70-80
A7	80-90
A8	>90
Weight has been converted to an ordinal variable, using the following scale:
Symbol	Range (Kg)
W1	36-50
W2	51-70
W3	71-90
W4	91-110
W5	111-130
W6	131-150
W7	>150

## Sheet: score adjustments - Val Cohorts
transformation	formula
TaqMan TLDA Card (X) to TaqMan StripTube (Y)	Y = 0.9589 X + 0.1573
Asuragen StripTube (Z) to TaqMan StripTube (Y)	Y = 1.0013 Z + 2.006
TaqMan StripTube (Y) to Asuragen StripTube (Z)	Z = 0.999 Y - 2.003
TaqMan TLDA Card (X) to Asuragen StripTube (Z)	Z = 0.958 X - 1.846
