# Supplementary material for: A Molecular Host Response Assay to Discriminate Between Sepsis and Infection-Negative Systemic Inflammation in Critically Ill Patients: Discovery and Validation in Independent Cohorts
Source: PLOS journal article supplement (doi:10.1371/journal.pmed.1001916), 2015-12-08
Supplement: S5 (10.1371/journal.pmed.1001916.s005) [file journal.pmed.1001916.s005]

**S5 Data** for McHugh et al., “A Molecular Host Response Assay to Discriminate Between Sepsis and Infection-Negative Systemic Inflammation in Critically Ill Patients: Discovery and Validation in Independent Cohorts”

## **Disease Severity as a Potential Confounding Variable**

### **1. Objective**

The objective was to investigate whether severity of disease, as measured by APACHE IV score or SOFA score, might be a confounding variable in using *SeptiCyte Lab* to discriminate between cases (sepsis) and controls (infection-negative systemic inflammation).

### **2. Method**

*Analysis #1:* The entire patient pool (Validation Cohorts 1+2+3+4+5, excluding patients classified with an infection likelihood of possible; n=306) was subjected to ROC curve analysis, using either *SeptiCyte Lab* score, SOFA score, or APACHE IV score as a classifier.

*Analysis #2:* The entire patient pool (Validation Cohorts 1+2+3+4+5, excluding patients classified with an infection likelihood of possible; n=306) was stratified into “bins” on the basis of SOFA score or APACHE IV score. *SeptiCyte Lab* was then applied to the separate “bins” and the resultant ROC curves were pairwise compared.

### 3. Results

*Analysis #1:* Comparative ROC curve analyses on the pooled data (Validation Cohorts 1+2+3+4+5, excluding patients classified with an infection likelihood of possible; n=306) have been presented in **Figure 5, Panel A** in the main text.

*Analysis #2:* Results of ROC curve analysis on subsets of the combined dataset, stratified on either APACHE IV Score or SOFA Score, are presented below in **Figure 1** (APACHE IV) and **Figure 2** (SOFA).

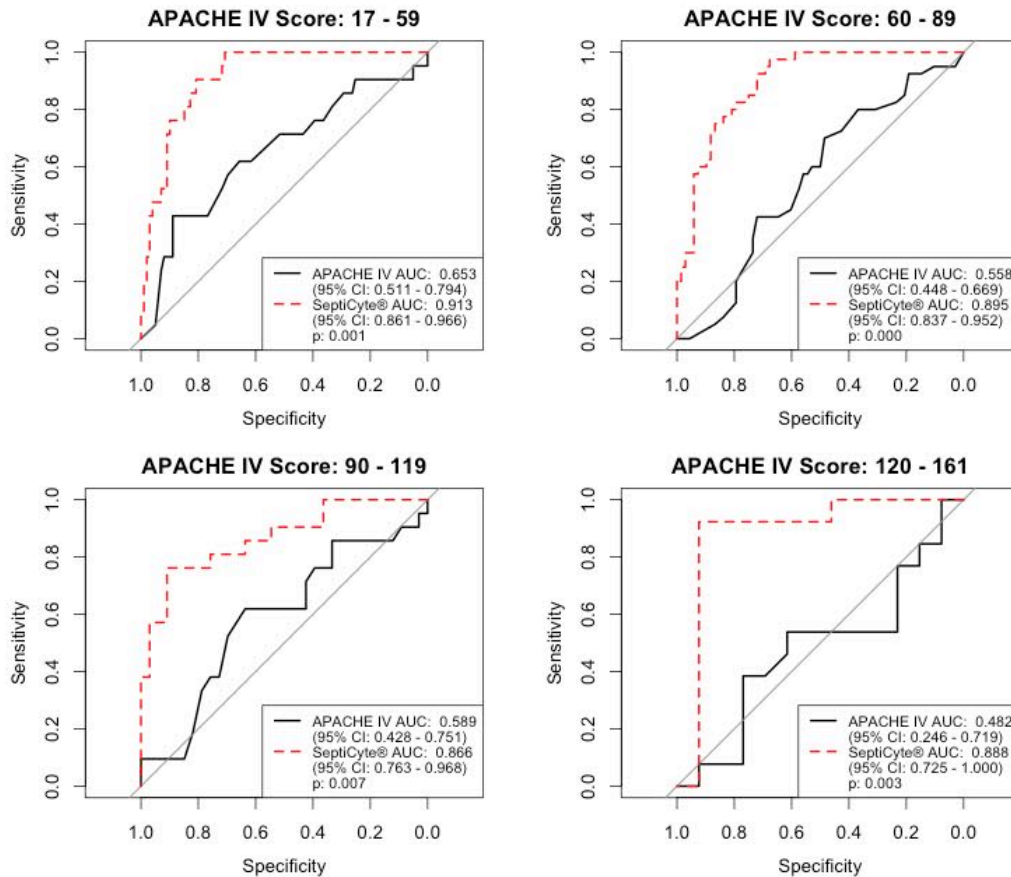

**Figure 1:** ROC plots for SeptiCyt Lab, after stratifying patients by APACHE IV score

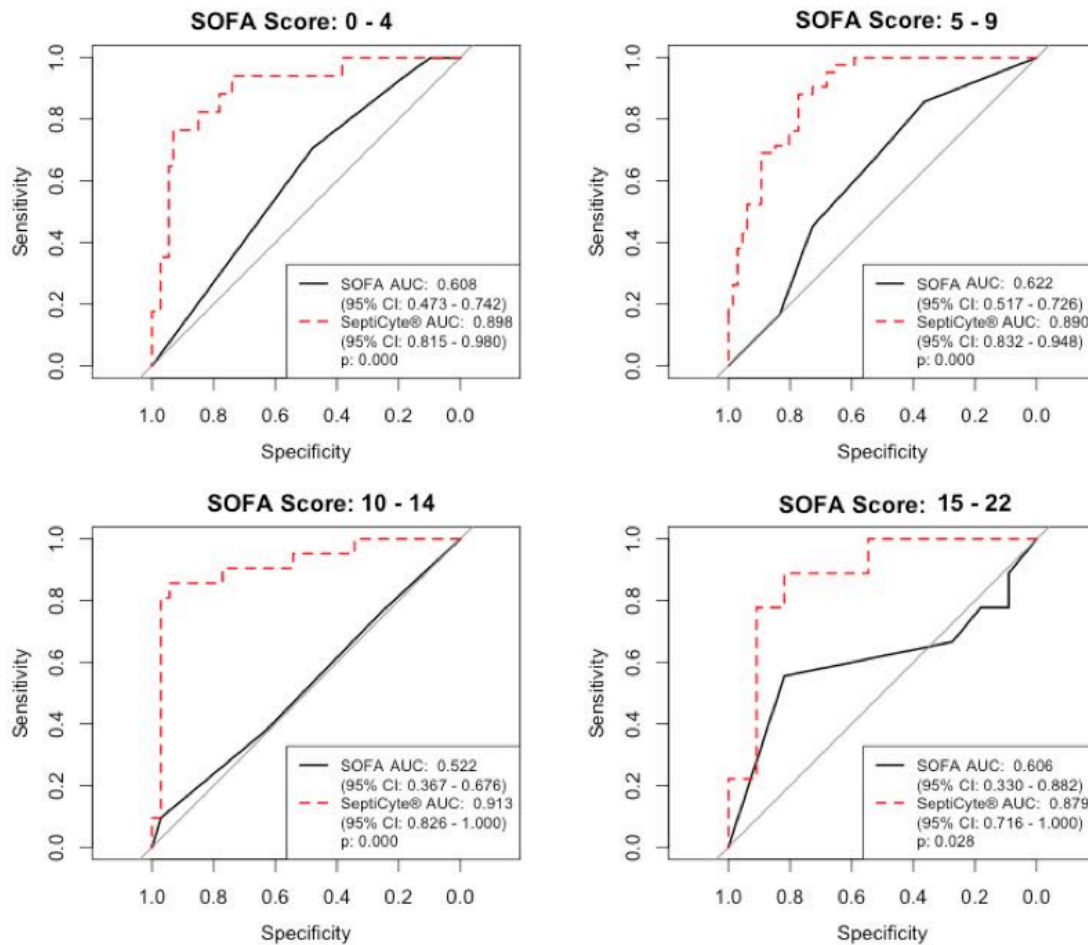

**Figure 2:** ROC plots for SeptiCyte Lab, after stratifying patients by SOFA score

The AUCs for the various bins are summarized in **Table 1** (APACHE IV Score) and **Table 2** (SOFA Score).

**Table 1:** Stratification of patients into APACHE IV Bins, followed by ROC curve analysis using SeptiCyte Lab.

| Apache IV bin | Composition           | AUC                         |
|---------------|-----------------------|-----------------------------|
| 17-59         | 99 controls, 21 cases | 0.913 (95% CI: 0.861-0.966) |
| 60-89         | 68 controls, 40 cases | 0.895 (95% CI: 0.837-0.952) |
| 90-119        | 33 controls, 21 cases | 0.866 (95% CI: 0.763-0.968) |
| 120-161       | 13 controls, 13 cases | 0.888 (95% CI: 0.725-1.000) |

**Table 2:** Stratification of patients into SOFA Bins, followed by ROC curve analysis using SeptiCyte Lab.

| SOFA bin | Composition           | Septicyte AUC               |
|----------|-----------------------|-----------------------------|
| 0-4      | 73 controls, 17 cases | 0.898 (95% CI: 0.815-0.980) |
| 5-9      | 66 controls, 42 cases | 0.890 (95% CI: 0.832-0.948) |
| 10-14    | 35 controls, 21 cases | 0.913 (95% CI: 0.826-1.000) |
| 15-22    | 11 controls, 9 cases  | 0.879 (95% CI: 0.716-1.000) |

The p-values for comparison across bins are given in **Table 3** (for APACHE IV Score) and **Table 4** (for SOFA Score). We found no significant difference between SeptiCyte Lab ROC curves across the different “bins”.

**Table 3:** p values for pairwise comparison of SeptiCyte Lab ROC curves, after stratifying patients by APACHE IV score

| APACHE IV Score | 17-59 | 60-89 | 90-119 | 120-161 |
|-----------------|-------|-------|--------|---------|
| 17-59           | 1.00  | 0.30  | 0.56   | 0.23    |
| 60-89           | 0.30  | 1.00  | 0.76   | 0.57    |
| 90-119          | 0.56  | 0.76  | 1.00   | 0.47    |
| 120-161         | 0.23  | 0.57  | 0.47   | 1.00    |

**Table 4:** p values for pairwise comparison of SeptiCyte Lab ROC curves, after stratifying patients by SOFA score

| SOFA Score | 0-4  | 5-9  | 10-14 | 15-22 |
|------------|------|------|-------|-------|
| 0-4        | 1.00 | 0.87 | 0.41  | 0.99  |
| 5-9        | 0.87 | 1.00 | 0.30  | 0.92  |
| 10-14      | 0.41 | 0.30 | 1.00  | 0.60  |
| 15-22      | 0.99 | 0.92 | 0.60  | 1.00  |
